# Supplementary material for: Radical-Omics Reveals the Hydrogen-Abstraction Pathway of Isoprene Oxidation
Source: Research Square preprint supplement (doi:10.21203/rs.3.rs-8176734/v1), 2025-12-10
Supplement: Supplementary file 1 [file ae9cbfa05d92e0ac97e97989.pdf]

# Supplementary Materials for

## Radical-Omics Reveals the Hydrogen-Abstraction Pathway of Isoprene Oxidation

Huan Song<sup>1†‡</sup>, Hongyang Cui<sup>2†</sup>, Huabin Dong<sup>1†</sup>, Ce Chen<sup>1, 2†</sup>, Wenyu Wei<sup>1</sup>, Yang Li<sup>1</sup>, Qindan Zhu<sup>3</sup>, Bo Tang<sup>4</sup>, Chongqin Zhu<sup>4</sup>, Xuefei Ma<sup>1</sup>, Zhaofeng Tan<sup>1</sup>, Shiyi Chen<sup>1</sup>, Yi Wan<sup>2\*</sup> & Keding Lu<sup>1\*</sup>

### Affiliations:

<sup>1</sup>College of Environmental Sciences and Engineering, Peking University, Beijing, China

<sup>2</sup> Laboratory for Earth Surface Processes, College of Urban and Environmental Science, Peking University, Beijing, China

<sup>3</sup>Department of Earth, Atmospheric, and Planetary Science, Massachusetts Institute of Technology, Cambridge, MA 02139, USA

<sup>4</sup>College of Chemistry, Beijing Normal University, Beijing, China

\*Corresponding authors. Email: [wany@urban.pku.edu.cn](mailto:wany@urban.pku.edu.cn); [k.lu@pku.edu.cn](mailto:k.lu@pku.edu.cn)

† These authors contributed equally to this work

‡ Present address: Department of Atmospheric and Climate Science, University of Washington, Seattle, WA 98195, USA

20    **The PDF file includes:**

21

22        Materials and Methods

23        Figs. S1 to S23

24        Tables S1 to S6

25        Synthetic Procedures and Characterization Data and Figs. S24 to S28

26

27

28

29    **Table of content**

30    S1. Materials and Methods ..... 3

31    S2. Figs.S1 to S23 ..... 24

32    S3. Tables S1 to S6 ..... 50

33    S4. Synthetic Procedures and Characterization Data and Figs. S24 to S28 ..... 58

34

35

## S1. Materials and Methods

### S1.1 Chemicals and Reagents

Methanol and acetonitrile (LC/MS grade) were obtained from Merck (Darmstadt, Germany). Milli-Q water was obtained by a Milli-Q water purification system (Millipore, USA). 5,5-Dimethyl-1-pyrroline N-oxide (DMPO) was obtained Aladdin (Shanghai, China). 2,2,6,6-Tetramethylpiperidoxyl (TEMPO) was obtain from Merck (Darmstadt, Germany). CHANT was obtained via the same synthetic procedure referring to Williams, et al.<sup>70</sup>. The high purified nitrogen (99.9999%) cylinders were purchased from AIR LIQUIDE SINGAPORE PTE LTD), isoprene cylinders (500 ppm) were purchased from National Institute of Metrology, China. 1-OH Ta, 1-OH Tb, 4-OH Ta, 4-OH Tb, structure 7, structure 10, structure 11, and DMPO-C<sub>5</sub>H<sub>7</sub> was synthesized according to Supplementary Information S4. Standards of the above synthesized chemicals were prepared in MeOH for mass spectrometry imaging (MSI) analysis.

### S1.2 Setup of Radical Generation and Capture Equipment

#### S1.2.1 Custom-build Calibration Source

A laboratory-fabricated calibration source for OH radicals was constructed, employing water vapor photolysis at 185 nm. The calibration system consists of a flow tube (length: 350 mm, inner diameter: ~17 mm) and a lamp module (Fig. S22). To minimize radical loss, the flow tube was coated with a silanization treatment (SilcoNert®, SilcoTek). The flow tube was designed to maintain laminar flow, ensuring a near-parabolic velocity profile and allowing radicals to achieve fully developed flow before entering the photolysis region. Typically, a parabolic velocity profile is characteristic of laminar flow at a rate of 20 L/min. Based on the tube's inner diameter and the

inlet flow rate, the Reynolds number was calculated as 1659.7, confirming a laminar flow regime with a central flow and thinner boundary layers<sup>71,72</sup>.

The UV light was provided by a low-pressure mercury discharge lamp (81-1025-01, BHK). A narrow-bandpass filter (185 nm, FWHM = 27.5 nm) was installed in the optical path to ensure that only the relevant photolysis radiation reached the photodetector. Water vapor concentration was adjusted via a dryer, and the mixing ratio of humid air was precisely regulated using a mass flow controller. Humidification of gas flow was achieved by passing the gas through a wash bottle filled with ultrapure water. The humidity of the mixed air was measured using a dew point hygrometer (HL-NT3-D, Rotronic).

The concentration of OH radical generated in the calibration source can be calculated by measuring the effective absorption cross-section of O<sub>2</sub> ( $\sigma_{O_2}$ ) and the concentration of O<sub>3</sub> following this equation<sup>73</sup>:

$$[\text{OH}] = [\text{HO}_2] = [\text{O}_3] \cdot \frac{[\text{H}_2\text{O}]\sigma_{\text{water}}}{2[\text{O}_2]\sigma_{\text{O}_2}} \quad (\text{Eq. S1})$$

Here,  $\sigma_{\text{water}}$  refers to the absorption cross-section of water ( $7.14 \times 10^{-20} \text{ cm}^2$ )<sup>74,75</sup>. To minimize the influence of oxygen on the concentration of R• and RO• radicals, we applied extremely low O<sub>2</sub> concentrations in all experiments. Under these conditions, both box model calculations and actual measurements indicated that the O<sub>3</sub> concentration was below the detection limit ( $< 2.87 \times 10^{-3} \text{ ppt}$ ). With the aid of a stable laser equipment, we first measured the ozone concentration to determine the OH concentration at 6.75% O<sub>2</sub>. Simultaneously, the signal intensity of OH (denoted as [OH]<sub>count</sub>) was recorded. Subsequently, we measured OH concentrations and recorded [OH]<sub>count</sub> under varying relative humidity and flow rates to establish their correlation, which was found to

be linear. This linear relationship allowed us to subsequently determine OH concentrations under low O<sub>2</sub> conditions (<0.1 ppm) directly from the [OH]<sub>count</sub> signal, without the need for further ozone measurements.

The junction between the calibration source and the solid phase column inlet is a 1/2 Teflon connection (Swagelok). We assume the inner wall of the cylindrical junction as very reactive towards the trace gas because of the collision loss of gas and wall due to the diameter changes. The wall loss rates inside the calibration source ( $k_{\text{wall1}}$ ) and at the junction between the calibration source and the solid phase column inlet ( $k_{\text{wall2}}$ ) can be calculated using Eq. S2 and Eq. S3, respectively<sup>76-78</sup>.

$$k_{\text{wall1}} = \frac{A}{V} \times \frac{2}{\pi} \times \sqrt{k_e D_g} \quad (\text{Eq. S2})$$

$$k_{\text{wall2}} = 3.66 \times \frac{D_g}{r^2} \quad (\text{Eq. S3})$$

Where  $\frac{A}{V}$  is the surface-area-to-volume ratio of calibration source equaling to 2.35 cm<sup>-1</sup>;  $k_e$  is the eddy diffusion coefficient of 0.0042 s<sup>-1</sup><sup>79</sup>;  $D_g$  is the diffusion coefficient;  $r$  is the inner diameter of the solid phase column inlet as 0.953 cm. The mean residence times inside the calibration source and, in the junction part, are 0.10 s and 0.02 s, respectively. The total wall loss of radicals needs to be corrected in the calculations. The wall loss rates and fractions of different species are shown in Table S3.

Table S5 summarizes the relative uncertainties associated with the calibration-derived radical concentrations. These uncertainties mainly arise from measurement errors, instrument characteristics, and literature values. By propagating each individual uncertainty using Gaussian

error propagation, the total uncertainty in the calculated radical concentration for this system is determined to be 6.67%.

### S1.2.2 Potential Aerosol Mass-Oxidation Flow Reactor (PAM-OFR)

Experiments were also performed in a commercial Potential Aerosol Mass-Oxidation Flow Reactor (PAM-OFR, Aerodyne Research, Inc., Billerica, Massachusetts, USA, hereafter referred to as OFR). In this study, the OH OFR mode was used to investigate the oxidant of isoprene in the absence of NO<sub>x</sub> at room temperature ( $T = 298 \pm 1$  K) and ambient pressure ( $P = 1003 \pm 2$  mbar) under the laminar flow condition. Isoprene at a flow rate of  $20 \text{ mL min}^{-1}$  was mixed into the humid synthetic air at a flow rate of  $10 \text{ L min}^{-1}$  before entering the OFR.

The total volume of the OFR is 13.3 L, and it consists of four low-pressure-Hg-lamp. High concentrations of oxidants (OH and O<sub>3</sub>) can be produced instantly by photolyzing O<sub>3</sub> and O<sub>2</sub>, and achieve hours to days of comparative photochemical aging in only minutes of actual time<sup>80</sup>. By utilizing different mercury lamp wavelengths, three distinct OFR modes can be achieved: OFR254, OFR185, and O<sub>3</sub> OFR. O<sub>3</sub> was produced from the irradiation of O<sub>2</sub> with a mercury lamp ( $\lambda = 185$  nm) and was measured with an O<sub>3</sub> monitor (Thermo Scientific model 49i, USA). Excited oxygen O<sup>1</sup>D atoms are produced from UV photolysis of O<sub>3</sub> ( $\lambda = 254$  nm) inside the OFR. The radical O<sup>1</sup>D then reacts with water vapor (introduced using a Nafion membrane humidifier; Perma Pure LLC) to produce OH radicals in the flow tubes. Both O<sub>3</sub> and OH will oxidize organic species. OH exposures were obtained by measuring the decay of SO<sub>2</sub> due to reaction with OH at specific UV lamp intensities and O<sub>3</sub> concentrations. First, SO<sub>2</sub> was introduced with the lamps turned off until its initial concentration (SO<sub>2,i</sub>) remained constant at steady-state conditions. Then, the flow tube and UV lamps were turned on and adjusted to a specific intensity. This condition was maintained

until the final SO<sub>2</sub> concentration (SO<sub>2,f</sub>) at the OFR outlet remained constant. Then, this procedure was repeated at several different conditions to obtain an OH exposure calibration. The OH exposure at each condition is calculated using Eq. S4:

$$OH_{exp} = \frac{1}{k_{OH+SO_2}} \times \ln \left( \frac{SO_{2,i}}{SO_{2,f}} \right) \quad (\text{Eq. S4})$$

where  $k_{OH+SO_2} = 9 \times 10^{-13} \text{ cm}^3 \text{ molec}^{-1}$  is the bimolecular rate constant between OH and SO<sub>2</sub><sup>81</sup>. Equation S4 is the result of integrating the differential rate equation for SO<sub>2</sub> and assuming pseudo-first order kinetics. Using this type of calibration procedure has two advantages. First, any potential bias resulting from SO<sub>2</sub> wall losses cancels out. Second, no assumptions about SO<sub>2</sub> residence times need to be made, since the OH exposure (product of the OH concentration and average residence time) is determined directly from the initial and final SO<sub>2</sub> concentrations.

We used OFR185 mode in the experiments of mixed total 200 ppb 111 VOCs oxidation with the resident time of 40s at a relative humidity of 6% ( $\pm 1\%$ ), with the carrier gas as zero air. Typical OH exposure was about  $2.6 \times 10^9$ . Assuming an average atmospheric OH concentration of  $1.5 \times 10^6 \text{ molec cm}^{-3}$ <sup>82</sup>, this experimental exposure is equivalent to 0.68 hour (about 40 mins) of atmospheric oxidation which is typically the lower limit of VOCs' lifetimes. Based on the measured OH exposure and modeling calculation<sup>80</sup>, OH radical was always the principal oxidant except for  $\alpha$ -pinene, which is 48% comparable to ambient value.

We used OFR185 mode in the experiments involving 500 ppb isoprene alone with liquid N<sub>2</sub> as the carrier gas to produce high concentration of OH radical to avoid the influence of ozone. The resident time is 80s, and the relative humidity is 15%. Typical OH exposure was about  $1.5 \times 10^9$ , which is equivalent to 0.38 hour (about 22 mins) of atmospheric oxidation.

The wall loss of RO<sub>2</sub> radicals in the reaction system consists of two parts: one is inside the OFR and the other is at the junction of the OFR and the solid phase column inlet, both of which can be viewed as first-order reactions. The wall loss rates inside the OFR ( $k_{\text{wall1}}$ ) and at the junction between the OFR and the solid phase column inlet ( $k_{\text{wall2}}$ ) can be calculated using Eq. S2 and Eq. S3, respectively<sup>76-78</sup>. The parameter  $\frac{A}{V}$  is the surface-area-to-volume ratio of OFR equaling to 25 m<sup>-1</sup>;  $k_e$  is the eddy diffusion coefficient of 0.0042 s<sup>-1</sup><sup>79</sup>;  $D_g$  is the diffusion coefficient;  $r$  is the inner diameter of the solid phase column inlet as 0.953 cm. The mean residence times inside the OFR and in the junction part are 40s, 80 s and 0.02 s, respectively. The wall loss rates and fractions of different species are shown in Table S4.

### S1.2.3 Experiment Settings of radical-omics method

Oxidation of isoprene was selected as a proof-of-principle model in the system. The oxidation reactions were conducted either in the custom-built calibration source or in the OFR, both maintained at controlled ambient temperature (~28 °C), pressure, and relative humidity (ranging from 5% to 60%). High-purity nitrogen served as the carrier gas, further purified through a dedicated deoxygenation system to ensure a low-oxygen environment. Given the total experimental gas flow rate of 20 L/min, eight Gas Clean Oxygen Filter tubes (YJ-O100) were employed in parallel to maintain efficient oxygen removal, accounting for the influence of high flow rates on deoxygenation efficiency. Each filter consists of an acrylic outer shell, a glass inner sleeve, a palladium/manganese oxide deoxidizing agent, and stainless-steel connectors. The internal dimensions are 4 cm in diameter, 28 cm in length, and 351.86 cm<sup>3</sup> in volume, with a maximum flow rate of 5 L/min. The filters achieve residual oxygen concentrations below 0.1 ppm under ambient conditions when treating nitrogen with an initial O<sub>2</sub> content below 1 ppm and at



flow rates under 5 L/min. As confirmed in SI Section S1.2.4, the oxygen concentration in the gas stream was maintained below 0.1 ppm. The UV lamp used for OH radical production was stabilized for at least 30 minutes under a continuous flow of high-purity nitrogen. Simultaneously, purified water in a bubbler was purged with high-purity nitrogen at 5 L/min for at least 30 minutes to efficiently remove dissolved oxygen. This setup ensured sufficiently short residence times and low O<sub>2</sub> concentrations for effective gas-phase radical trapping. After deoxygenation, isoprene was introduced into the system and maintained at 0.5 ppm, providing an excess reactant for OH oxidation.

A solid-phase column was connected to the oxidation system via a 1/2-inch Teflon connector (Swagelok) to capture the generated radicals. Within the column, purified trapping agents—DMPO, TEMPO, or CHANT, as described in Section S1.2.6—were non-covalently bound to a solid polymer matrix, ensuring high sampling efficiency. To prevent photolysis of the trapped radicals and other side reactions, the column was completely wrapped in aluminum foil. For consistency in sensitivity and stability of the trapping reactions across experimental runs, the column temperature was maintained at 30 °C using a precision-controlled spiral heating tape. In the photolysis region of the calibration source, isoprene underwent oxidation, generating reactive radicals within ~0.011 seconds. These intermediates subsequently reacted through inter- and intramolecular pathways in the dark for an additional ~0.109 seconds before being efficiently captured by the solid-phase trapping agents. After sample collection, 5 mL of methanol was used to elute the trapped radicals from the column. A 40 µL aliquot of the eluate was analyzed by UHPLC-Orbitrap-MS (Thermo Fisher Scientific, Bridgewater, NJ, USA) and subsequently quantified by UPLC-MS/MS (Waters, Milford, USA), according to the procedures outlined in Section S1.3.

The absolute concentrations of the target adduct in the elution could be calculated via the comparison with the relative synthetic standard samples. After that, we could calculate the gas phase concentrations of  $\cdot\text{C}_5\text{H}_8(\text{OH})$  and  $\cdot\text{C}_5\text{H}_7$  radicals by the following equation:

$$[\text{Radical}_g] = [C_l] \cdot \frac{[V_e]RT}{P M_r V_s} \quad (\text{Eq. S5})$$

where  $[\text{Radical}_g]$  is the concentration of radical in the gas phase;  $[C_l]$  is the captured compounds concentration in the elution;  $[V_e]$  is the volume of the elution as 5 mL;  $R$  is the gas constant;  $T$  is the temperature;  $P$  is the pressure,  $M_r$  is the molecular mass of the captured compound, for TEMPO- $\text{C}_5\text{H}_8(\text{OH})$  as 241.275 and DMPO- $\text{C}_5\text{H}_7$  as 181.147;  $V_s$  is the total volume of sample gas flow.

#### S1.2.4 Detection of the Oxygen Concentration

The oxygen concentration in nitrogen gas, both from the original cylinder and after deoxygenation, was measured using a gas chromatograph equipped with a plasma emission detector (PED) (LDetek, Canada). During measurement of the nitrogen passing through the deoxygenation tube, the flow rate was set at 2 L/min to match experimental conditions, and a three-way valve was used to divert gas for oxygen detection. Measurements were performed with the Multidetek2 system (LDetek, Canada) using high-purity argon (>99.9999%) as the carrier gas, with a carrier flow rate of 25 mL/min and a sample flow rate of 0.6 mL/min. Gas separation was achieved with a 5A (13 $\times$ ) molecular sieve column. The instrument parameters were as follows: oven 1 temperature, 80 °C; oven 2 temperature, 70 °C; HCD temperature, 45 °C; detector temperature, 60 °C; and analysis time, 300 s. Measurement of the oxygen concentration in nitrogen gas was assisted by the National Institute of Metrology, China. The oxygen concentration in

nitrogen directly from the cylinder was determined to be 0.51 ppm, while the concentration after deoxygenation was below 0.1 ppm.

The oxygen concentration in isoprene was measured using an Agilent 8890 gas chromatograph equipped with a helium ionization detector (Agilent Technologies, Inc., USA). The calibration standard was a primary standard gas (0.993 ppm O<sub>2</sub>) from the National Institute of Metrology. The column configuration included: column 1, HP-PlotQ capillary (30 m × 0.32 mm × 20 μm); column 2, MS 5A capillary (30 m × 0.53 mm × 50 μm); columns 3 and 4, Hayesep Q packed columns. The column and detector temperatures were set at 40 °C and 60 °C, respectively. This analysis was supported by Sichuan Zhongce Standard Technology Co., Ltd, China. The measured oxygen concentration in isoprene used for this study was 1.62 ppm. For the experiments, isoprene was introduced at 20 mL/min in a total flow of 20 L/min in the calibration source, and at 20 mL/min in a total flow of 10 L/min in the OFR. In both cases, the total oxygen concentrations were maintained below 0.1 ppm, which was also the value used in the box model simulations.

#### S1.2.5 Quantification Controls (QCs)

To ensure the correct identification and accurate quantification, strict QCs were implemented in our study. The experiments were carried out in the high-efficiency particulate absorbing (HEPA), positive-pressure, and carbon-filtered clean air lab to minimize blank contamination. All glass equipment was cleaned and rinsed with DCM and n-hexane three times before use. After the preparation of solid phase capture column, the columns were sealed with sealing film (Parafilm®) and secondary seal in a cleaned Ziploc bag. Different concentrations of the synthetic samples were measured and standard curves were plotted in every batch of experiments to correct for variability due to the instrument response.

### S1.2.6 The Preparation of Solid-phase Capture Column

Although the purification of commercially purchased DMPO and TEMPO were at high levels (98%), we still detected high impurities of radical adducts possibly formed during their production, which greatly interfered our analysis. Therefore, working standard solutions of DMPO and TEMPO were freshly prepared by HPLC purification process in every batch of experiment. Briefly, 0.2 g DMPO or TEMPO were dissolved in 1 mL loading buffer (Loading buffer was MeOH:H<sub>2</sub>O = 1:1). The analytical HPLC system consists of two Shimadzu LC-20AT solvent pumps, an CBM-20A system controller, a Prominence SPD-20A diode array detector performing the wavelength scanning from 190 to 400 nm, a manual sample injection valve with a 1 mL loop and an LC Solution workstation for data acquisition and process (Shimadzu, Japan). The samples were separated and analyzed by a reversed phase InertSustain<sup>®</sup> C18 (250 mm × 4.6 mm i.d., 5 μm, Shimadzu, Kyoto, Japan) column. The mobile phase was consisted of A (water) and B (methanol), which was programmed as follows: 0-3 min, 10% B; 3-30 min, 10-100% B; 30-35 min, 100% B; 35-36 min, 100-10% B; 36-40 min, 10% B. The flow rate was 2 mL/min while the ambient temperature was controlled at 20 °C by air conditioner. The data collection time, sampling interval, response time and pool temperature were 0-36.1 min, 500 msec, 1.0 sec and 40 °C, respectively. For DMPO, the chromatograms were acquired at 270 nm and 275 nm. For TEMPO, the chromatograms were acquired at 450 nm and 435 nm. Then 2 mL of purified DMPO or TEMPO were collected. Finally, the purified DMPO or TEMPO were diluted to 20 mL with water for trapping of radicals.

The radical capture device in this study was capture column, which consisted of a 5 cm 1/2 outer diameter Teflon tube, a 3 cm 1/4 outer diameter Teflon tube, a 1/2 to 1/4 turn Teflon tube connector, 80 mg CNW Poly-Sery HLB Pro sorbent (ANPEL Laboratory Technologies (Shanghai) Inc.,

Shanghai, China), and a 6 mL PE frit (ANPEL Laboratory Technologies (Shanghai) Inc., Shanghai, China). The HLB sorbent was filled into a 1/2 outer diameter Teflon tube, with a PE frit attached and tightly sealed with a Teflon tube connector connected to a 1/4 tube. The HLB sorbent was activated with 15 mL MeOH and 15 mL distilled water. The purified capture agent solution (DMPO, TEMPO or CHANT) were loaded on the column, and the sorbents were then dried under gentle nitrogen to remove the water, thus completing the preparation of the capture column.

#### S1.2.7 Sampling Efficiencies of Capture Column

To evaluate the capture efficiency of the capture column, 750 mg of sorbent was packed and divided into three segments, with each segment analyzed separately to assess sampling efficiency. After radical capture, the column was carefully disassembled to prevent sorbent loss. Trapped radicals were eluted from each segment by adding 5 mL of methanol to the collection vessel. The eluate was filtered using a hydrophobic PTFE needle filter (ANPEL Laboratory Technologies, Shanghai, China) to remove any sorbent particles. A 40  $\mu$ L aliquot of the filtered solution was then subjected to UHPLC-Orbitrap-MS analysis to determine the capture efficiency of the column. Due to their short life-time and high activity, radicals have already reacted completely before reaching the third segments. Therefore, the third segment was used as a blank. And the capture efficiency ( $\alpha$ ) was calculated as follow:

$$\alpha = 1 - \frac{C_1}{C_0} = 1 - \frac{1}{m} \quad (\text{Eq. S6})$$

Where  $C_0$  and  $C_1$  was the concentration of radicals before and after being captured by the sorbent, respectively, the mass spectrum peak area  $A_1/A_2$  was set as  $m$ , and  $A_1$  and  $A_2$  was the mass spectrum peak area of captured radicals from the first and second segment, respectively. And for

274 TEMPO, the efficiency for capturing C<sub>5</sub>H<sub>9</sub>O, C<sub>5</sub>H<sub>9</sub>O<sub>3</sub>, C<sub>5</sub>H<sub>7</sub>O and C<sub>5</sub>H<sub>7</sub>O<sub>2</sub> was 99.58%, 86.59%,  
 275 87.98%, and 100%, respectively. For DMPO, the efficiency for capturing C<sub>5</sub>H<sub>9</sub>O, C<sub>5</sub>H<sub>9</sub>O<sub>3</sub>, C<sub>5</sub>H<sub>7</sub>,  
 276 C<sub>5</sub>H<sub>7</sub>O and C<sub>5</sub>H<sub>7</sub>O<sub>2</sub> was 100%, 100%, 100%, 96.04% and 100%, respectively.

## 277 S1.2.8 Kinetic Reactions Between Capture Agents, Oxygen and Radicals

278 Allylic radicals (U•) such as •C<sub>5</sub>H<sub>8</sub>(OH) and •C<sub>5</sub>H<sub>7</sub> in the gas flow react with O<sub>2</sub> and each other  
 279 to produce further products. In the moment of reaching out with capture agents (T) doped on the  
 280 filter, competitive reactions occur and therefore the following equations:

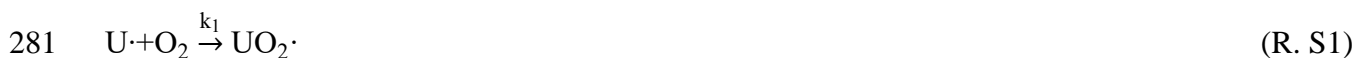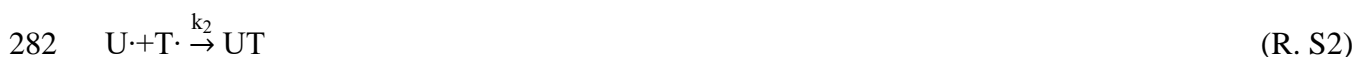

283 Because of the high concentration of oxygen and capture agents, we can assume they are both  
 284 quasi-first-order reaction. Thus, after the calculation, we got the concentration of adducts as:

$$285 \quad [\text{UT}] = [\text{U}\cdot] \frac{k_2[\text{T}\cdot]}{k_1[\text{O}_2] + k_2[\text{T}\cdot]} (1 - e^{-(k_1[\text{O}_2] + k_2[\text{T}\cdot])t}) \quad (\text{Eq. S7})$$

286 Where the exponential operator is infinitely close to 1 because of the large reaction rate k<sub>1</sub> and  
 287 k<sub>2</sub> and the excess oxygen and T•. In this condition, the concentration of adducts only relate to the  
 288 competitive reaction rates of radical with oxygen. The captured concentration of •C<sub>5</sub>H<sub>7</sub> increased  
 289 with decreasing residence time (RT) shown in the Fig. S23 further unveiled the higher rate of  
 290 •C<sub>5</sub>H<sub>7</sub> with O<sub>2</sub> than •C<sub>5</sub>H<sub>8</sub>(OH). In the moment of these radicals reached out for the capture agents,  
 291 lower ratio of •C<sub>5</sub>H<sub>7</sub> could be captured by TEMPO because of its higher rate with oxygen than  
 292 •C<sub>5</sub>H<sub>8</sub>(OH). DMPO and CHANT, on the other hand, although have higher reaction rates with

•C<sub>5</sub>H<sub>7</sub>, their adducts were also detected as lower concentration before the dioxygen producer as shown in Fig. S11.

#### S1.2.9 Nearest Neighbor Simulation (NNS) Method

To accurately interpret the experimental results, it was essential to ensure that the measured concentrations of the captured adducts truly reflected their original branching ratios. To evaluate the true branching ratio in the system, we used the explicit isoprene oxidation mechanism<sup>83</sup> to inverse the branching ratio. We then utilized Nearest Neighbor Simulation (NNS) to determine the initial branching ratios of the four isomeric radicals as 1-OH cis, 1-OH trans, 4-OH cis and 4-OH trans. Because of the lack of the other two isomers in the mechanism, we omitted their yield which is smaller than 5%. A total of 9,751 branching ratio scenarios were evaluated by comparing simulated and experimentally measured concentration ratios. The scenario yielding the smallest deviation was identified as the most accurate representation of the initial branching ratios, as shown in Figure S10.

### S1.3. Analysis of Captured Radicals

#### S1.3.1 UPLC-Orbitrap-MS Analysis

Nontargeted radical profiling UPLC-HRMS analysis was carried out on an Thermo Vanquish UPLC system coupled with Q-Exactive Plus mass spectrometer (Thermo Fisher Scientific, U.S.A.) equipped with a heated electrospray ionization (HESI) source. An ACQUITY UPLC® CSH™ Fluoro-Phenyl column (2.1 × 100 mm, 1.7 μm particle; Waters) and a mobile phase containing (A) MeOH and (B) ultrapure water were also employed, with a flow rate of 0.3 mL min<sup>-1</sup>, to separate

the substances with extremely similar polarities. The column and sampler temperatures were maintained at 40 °C and 4 °C, respectively. A total of 5 µL of each sample was injected into the column. The gradient elution program was as follows: the A phase remained at 95% for 1 minutes, then linearly decreased from 95% to 66% from 1 to 2 min and was maintained at 66% from 2 to 13 min; then the A phase linearly decreased from 66% to 0% from 13 to 23 min, and after that, the column was re-equilibrated with 95% B for 2 min before the next injection.

The Orbitrap-MS was operated in positive mode (ESI<sup>+</sup>). The mass spectra were collected in Full-MS ddMS2 analysis with top five ions from each MS1 scan being selected for MS/MS fragmentation. To further identify the structures, MS/MS spectra were obtained by PRM mode with inclusion list consisted of compounds of interest. MS1 spectra (*m/z* 50-500) were recorded with inclusion list consisted of compounds of interest. MS1 spectra (*m/z* 50-500) were recorded at resolution of 70,000, with a maximum of  $1 \times 10^6$  ions collected within 100 ms. MS/MS spectra were obtained with an isolation window of 2 *m/z* and the resolution of 17,500. The normalized collisional energy of higher-energy collisional dissociation was set to 10, 30, and 50. The optimized heated ESI source parameters were set as follows: the spray voltages, 3.5 kV; the capillary temperature, 320 °C; the sheath gas flow rate, 40 Arb; the auxiliary gas flow rate, 10 Arb; the auxiliary gas heater temperature, 300 °C; the sweep gas flow rate, 2 Arb; and the S-lens radio frequency (RF) level, 50. Thermo Xcalibur Qual Browser (Thermo Fisher Scientific, USA) was employed for visualization, processing, and interpretation of mass data.

### S1.3.2 Non-Targeted Identification of Trapped Radicals

Thermo Xcalibur Qual Browser (Thermo Fisher Scientific, USA) was employed for visualization, processing, and interpretation of mass data. Progenesis QI 2.3 software (Waters,



USA) was employed to perform the chromatographic peak alignment, picking, and normalization. The picked signals were further proceeded with an intensity more than 10 times that of the corresponding peak from the procedural blank. The molecular formulas corresponding to the signals were determined based on ion mass errors lower than 5 ppm. In this study, TEMPO, DMPO and CHANT trapped various radicals to explore its potential application in the identification of radicals. The most abundant fragmentation ions of TEMPO-radical adducts were at  $m/z$  of 126.13 or 140.14, which is generated by the loss of TEMPO group from the adduct. Similarly, the most abundant fragmentation ions of DMPO-radical adducts were at  $m/z$  of 114.09 or 98.10, generated by the loss of DMPO. The CHANT-radical adducts generated fragmentation ions of  $m/z$  83.09 or 152.11 via loss of its component ( $C_6H_{11}$  or  $C_9H_{14}ON$  group). Therefore, the characteristic ions of each trapping agents were used in the MS/MS analysis to identify the potential radicals trapped in our system.

### S1.3.3 Targeted Identification of Trapped Radicals

To confirm the origin of  $[DMPO-C_5H_7+2H]^+$ , and referring to the calculations of Ma, et al.<sup>84</sup>, we additionally detected its subsequent oxidation products. including  $O_2$ -adduct peroxy radicals  $[DMPO-C_5H_7O_2+2H]^+$  ( $m/z=214.14377$ ), cyclized dioxolane radicals  $[TEMPO-C_5H_7O_2+H]^+$  ( $m/z=256.19072$ ), alkoxy radicals  $[DMPO-C_5H_7O+2H]^+$  ( $m/z=256.19072$ ), a possible oxetane-substituted methyl radicals  $[TEMPO-C_5H_7O+H]^+$  ( $m/z=240.1958$ ), its  $O_2$ -adduct peroxy radicals  $[DMPO-C_5H_7O_3+2H]^+$  ( $m/z=230.13868$ ), and the allylic radicals formed after peroxy radicals' H-shift reaction  $[TEMPO-C_5H_7O_3+H]^+$  ( $m/z=272.18563$ ). All these products were further infused into the HESI- Orbitrap-MS in a positive ion mode to explore their fragmentation. The molecular mass of  $[DMPO-C_5H_7O_2+2H]^+$  were found as precursor ions, and regular and intense product ions with 55.06, 114.09, 214.14 were observed. Similarly, the molecular mass of  $[DMPO-C_5H_7O+2H]^+$

<sup>+</sup> were found as precursor ions, and regular and intense product ions with 81.07, 98.10, 198.15 were observed. The product ion of 98.10 and 114.09 were considered to cause a loss of DMPO in the DMPO trapped radicals. Compound [TEMPO-C<sub>5</sub>H<sub>7</sub>O<sub>2</sub>+H]<sup>+</sup> and [TEMPO-C<sub>5</sub>H<sub>7</sub>O+H]<sup>+</sup> were also found as precursor ions, respectively. The product ion of 126.13 was derived from the TEMPO of the TEMPO trapped radicals. The identification of these oxidation products further supports our assignment of the peak at retention time 5.77 min as the captured •C<sub>5</sub>H<sub>7</sub> radical. The products from •C<sub>5</sub>H<sub>7</sub> follow the similar line of •C<sub>5</sub>H<sub>9</sub>O oxidation. Peroxyl radical C<sub>5</sub>H<sub>7</sub>O<sub>2</sub>• produces cyclized dioxolane radical and alkoxy radical under no NO<sub>x</sub> condition. Alkoxy radical undergoes cyclization<sup>85</sup> reaction to oxetane-substituted methyl radical. Visible ratio of C<sub>5</sub>H<sub>7</sub>O• to C<sub>5</sub>H<sub>7</sub>O<sub>2</sub>• under no NO<sub>x</sub> condition indicated the possibility of a new reaction pathway involving the generation of RO• radicals, and followed by rapid 1,5-HAT, β-scission, or cyclization, potentially leading to R• radical formation in the atmosphere. What's more, in the line of •C<sub>5</sub>H<sub>7</sub> oxidation, the cyclization pathway do not fully align with the •C<sub>5</sub>H<sub>9</sub>O oxidation, suggesting that additional reaction pathways may generate new products contributing to secondary organic aerosol (SOA) formation, particularly in environments where highly oxygenated molecules (HOMs) or IEPOX-like products may form<sup>84</sup>.

#### S1.3.4 UPLC-MS/MS Analysis

Targeted quantification of trapped radical analysis was carried out on a ACQUITY UPLC coupled with Xevo TQXS triple quadrupole mass spectrometry (Waters, Milford, USA) equipped with an electrospray ionization (ESI) source. An ACQUITY UPLC® CSH™ Fluoro-Phenyl column (2.1 × 100 mm, 1.7 μm particle; Waters) and a mobile phase containing (A) ultrapure water and (B) MeOH were employed for chromatographic separation, with a flow rate of 0.3 mL min<sup>-1</sup>, to obtain the abundant responses of the targeted trapped radicals. The column and sampler

temperatures were maintained at 35 °C and 8 °C, respectively. A total of 2 µL of each sample was injected into the column. The gradient elution program was as follows: the B phase remained at 5% for 1 minutes, then linearly increased from 5% to 34% from 1 to 4 min and maintained at 34% from 4 to 12 min. Then, the B phase linearly increased from 34% to 100% from 12 to 23 min. After that the column was re-equilibrated with the initial mobile phase composition for 2 min before the next injection.

The MS/MS was operated in positive mode (ESI<sup>+</sup>). The mass spectra were collected in multiple-reaction monitoring (MRM) mode. The parameters were set as follow: the capillary voltage, 3 kV; the cone voltage, 30 V; the source offset voltage, 30 V; the source temperature, 150 °C; the desolation temperature, 500 °C; the cone gas flow rate, 1,200 L/Hr; the collision gas flow rate, 0.15 mL/min; the nebulizer gas flow, 7 Bar. The data were obtained and analyzed using MassLynx V4.2 software (Waters, Milford, USA).

#### S1.3.5 Standard curves of captured compounds

The concentrations of captured radicals were quantified relative to the synthesized standard sample. The synthesized standard samples were diluted with methanol into solutions of different concentrations: six different concentrations of mixed standard solutions of 1-OH Ta and 1-OH Tb between 0.1 ng/mL and 20 ng/mL, six different concentrations of mixed standard solutions of 4-OH Ta and 4-OH Tb between 0.05 ng/mL and 10 ng/mL, and six different concentrations of standard solution of DMPO-C<sub>5</sub>H<sub>7</sub> between 0.1 ng/mL and 10 ng/mL. All stock solutions were stored at -80 °C, and a series of diluted solutions were stored at -20 °C. During each mass spectrometry analysis, the same method was used to analyze a series of standard solutions of different concentrations. The concentration of each part in the mixed standard sample was

determined based on the average proportion of signal response intensity. Standard curves between signal response intensity and concentrations were obtained from standard solutions of different concentrations. For each experiment, all curves provided adequate linearity ( $R^2 > 0.995$ ). Figure S2 showed the standard curve used in a certain experiment.

#### S1.4. Theoretical Methods and Modeling Calculation

##### S1.4.1 Quantum Chemical Calculation.

Structures were fully optimized at the UB3LYP-D3/6-31+G(d,p) level of theory. For the isomerization reactions, vibrational frequency calculations were performed to make sure that there is zero (one) imaginary frequency for minimum (transition state) structures. In addition, intrinsic reaction coordinate (IRC) was performed at same level to check the connectivity among reactant, product and transition state. All these calculations were performed using the Gaussian 16 program<sup>86</sup>.

##### S1.4.2 Rate Constant Calculations

All rate constant calculations  $k$  were performed using a Master Equation Solver for Multi Energy-well Reactions (MESMER) code<sup>87</sup>. For the barrierless TEMPO+C<sub>5</sub>H<sub>9</sub>O reactions, conventional TST and variational TST are not appropriate because the reaction coordinated is not well-defined, a situation which is typical of association reactions between two pen-shell species<sup>88</sup>. Therefore, the associated  $k$  rate constants for the barrierless bimolecular reactions were evaluated by the Inverse Laplace Transform (ILT) method of the modified Arrhenius form of the

experimental high-pressure association rate coefficient<sup>89</sup>. The general ILT method can be represented in Eq. S7:

$$k^{\infty}(\beta) = A^{\infty} \left(\frac{1}{\beta}\right)^{n^{\infty}} \exp(-\beta E^{\infty}) \quad (\text{Eq. S7})$$

Where  $k^{\infty}(\beta)$  is the high pressure limiting rate coefficient;  $\beta=1/kT$ ;  $A^{\infty}$  is the preExponential, and  $n^{\infty}$  is the infinity; T was set to 300K;  $A^{\infty}$  was set to  $6.2 \times 10^{-12} \text{ cm}^3 \text{ molecule}^{-1} \text{ s}^{-1}$ ;  $E^{\infty}$  and  $n^{\infty}$  are both set to 0, which are identical to those used previously<sup>90,91</sup>. The input parameters for electronic geometries, vibrational frequencies, and rotational constants were calculated at UB3LYP-D3/6-31+G(d,p) level.

#### S1.4.3 Box Model Settings

To evaluate the true branching ratio in this no chemical equilibrium system, we used the MCM v3.3.1 isoprene oxidation mechanism to inverse the branching ratio. Given the low oxygen concentration in our study, its impact was accounted for in the correction of KDEC, a generic rate coefficient applied to hydroxyalkoxy species decomposition. Parameters such as temperature, pressure, photolysis time, residence time, and dilution coefficient were input into the kinetic box model.

#### S1.4.4 CAM-Chem Simulation

We use the Community Earth System Model/Community Atmosphere Model with chemistry version 2.2.0 (CAM-Chem) to investigate the impact of an updated isoprene oxidation mechanism on the global radical budget and secondary organic aerosol (SOA) formation<sup>92,93</sup>. The CAM-Chem simulations are conducted at a horizontal resolution of  $1.25^{\circ} \times 0.95^{\circ}$  with 32 vertical layers.

Meteorological fields are nudged to the Modern-Era Retrospective Analysis for Research and Applications, Version 2 (MERRA-2). Anthropogenic and biomass burning emissions are consistent with the Coupled Model Intercomparison Project Phase 6 (CMIP6)<sup>94-96</sup>. Biogenic NMVOC emissions are calculated online using the Model of Emissions of Gases and Aerosols from Nature (MEGAN) v2.1<sup>97</sup>. We conduct three simulations using identical emissions but varying chemical mechanisms. The baseline simulation is configured with the MOZART-TS2 mechanism<sup>98</sup>. The second simulation incorporates an updated TS2 mechanism with hydrogen abstraction pathway and the corrected branching ratio of OH addition allylic radical. All simulations results are performed average values for the period 2011–2013.

Beyond SOA precursors discussion in the manuscript, the shift in branching ratios exerts broader impacts on atmospheric oxidative balance. The redistribution of oxidation flux away from IEPOX suppresses one known HO<sub>x</sub> recycling pathway associated with IEPOX multiphase processing. As illustrated in Figure S20, model simulations capture regional variations in OH production rates, with decreases over isoprene-rich humid tropics such as the Amazon, Congo Basin, Maritime Continent, and Southeast Asia where IEPOX-driven HO<sub>x</sub> recycling is diminished. In contrast, moderate increases appear over subtropical and temperate regions such as East Asia, South Asia, and the southeastern United States, reflecting the net response of the altered oxidation network. While the current model framework does not explicitly resolve potential secondary radical cycling involving H-abstraction-derived products, the chemical structure of these dicarbonyls suggests possible reactivity in both aqueous-phase and multiphase radical networks, potentially contributing additional HO<sub>x</sub> regeneration and SOA formation under specific conditions. Further laboratory and mechanistic studies are required to quantify these pathways, particularly under tropical convective conditions. In addition to the spatial responses, global mean diagnostics

467 indicate that the incorporation of H-abstraction induces limited changes in the global OH  
468 concentration (Table S6). However, regional redistribution of isoprene oxidation flux reduces  
469 IEPOX while enhancing highly oxygenated intermediates, potentially elevating aqueous SOA  
470 formation in susceptible regions.

471

## S2. Figs.S1 to S23

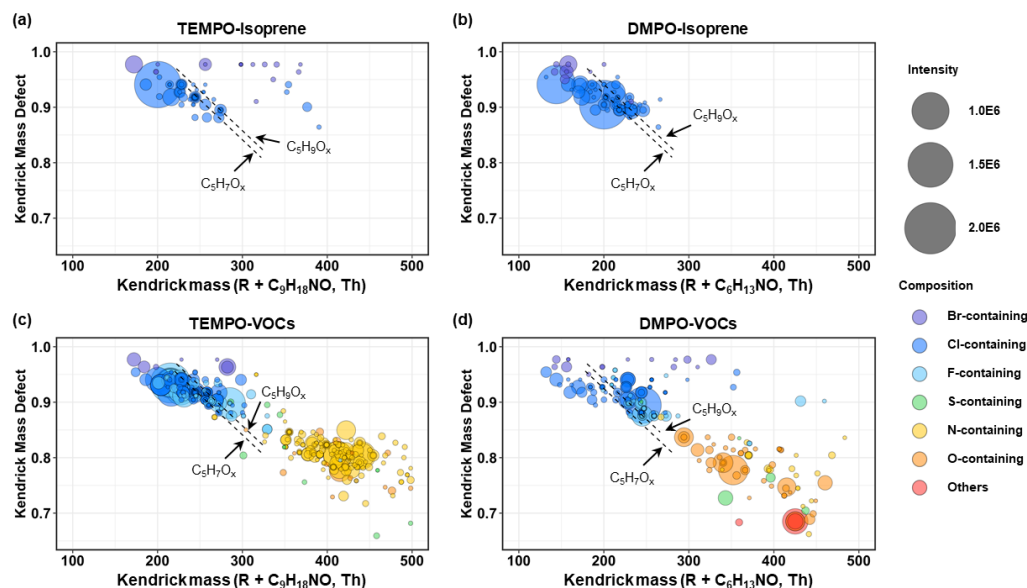

Figure S1. Kendrick mass–defect fingerprints of radical adduct formed during OH oxidation.

(a) TEMPO–isoprene; (b) DMPO–isoprene; (c) TEMPO–mixed VOCs; (d) DMPO–mixed VOCs.

The x-axis is the Kendrick mass (Th) after adding the trap mass to the radical:  $R + C_9H_{18}NO$  for TEMPO and  $R + C_6H_{13}NO$  for DMPO. The y-axis is the Kendrick mass defect (KMD). Each circle denotes a uniquely assigned radical adduct (R–TEMPO or R–DMPO). Symbol area scales with ion signal (reference sizes at right:  $1.0 \times 10^6$ ,  $1.5 \times 10^6$ ,  $2.0 \times 10^6$  abundance). Colors indicate elemental classes (legend at lower right: Br-, Cl-, F-, S-, N-, O-containing, and others meaning  $C_xH_y$  species). Dashed arrows highlight two recurrent homologous families,  $C_5H_9O_x$  and  $C_5H_7O_x$  ( $x=0-5$ ). The  $C_5H_9O_x$  cluster is consistent with adducts of OH-addition-derived allylic radicals, whereas the  $C_5H_7O_x$  cluster indicates hydrogen-abstraction-derived carbon-centered radicals ( $\bullet C_5H_7$ ). The same two trends appear in both single-precursor (isoprene) and mixed-VOC experiments and for both traps, demonstrating methodological consistency and providing a unified, omics-style fingerprint of early-stage radical chemistry.



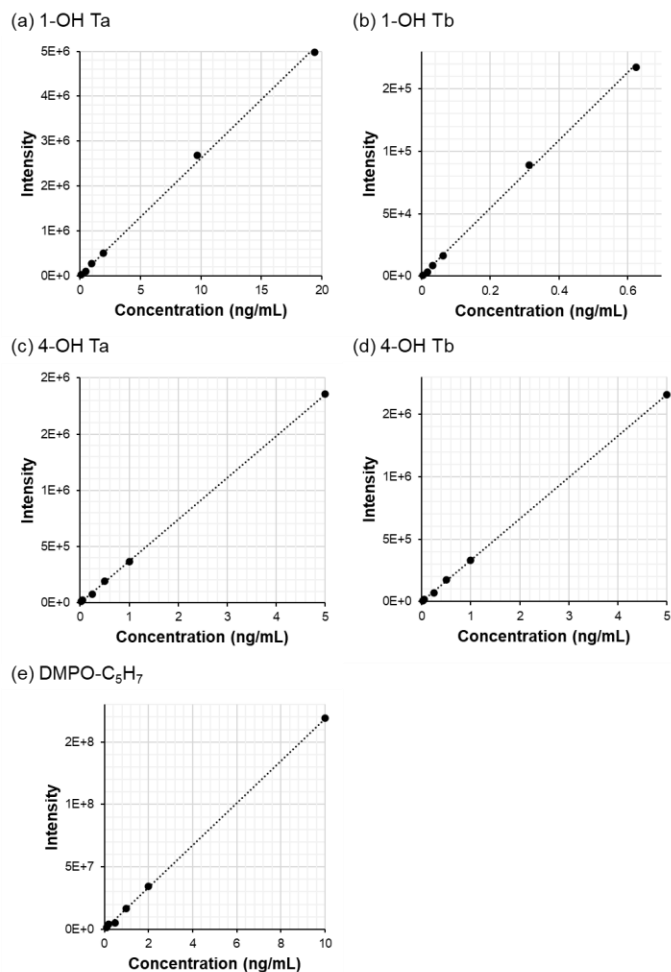

Figure S2. Standard curves of each TEMPO-C<sub>5</sub>H<sub>9</sub>O and DMPO-C<sub>5</sub>H<sub>7</sub> standard samples in a certain experiment. The standard curves were calculated in every batch of experiment, we just showed one of them here. (a) 1-OH Ta: Intensity =  $260741 \times \text{Concentration (ng/mL)} + 14457$  ( $R^2=0.9987$ ). (b) 1-OH Tb: Intensity =  $271456 \times \text{Concentration (ng/mL)} + 116.21$  ( $R^2=0.999$ ). (c) 4-OH Ta: Intensity =  $372084 \times \text{Concentration (ng/mL)} - 3471.1$  ( $R^2=0.9999$ ). (d) 4-OH Tb: Intensity =  $332100 \times \text{Concentration (ng/mL)} - 1738$  ( $R^2=0.9999$ ). (e) DMPO-C<sub>5</sub>H<sub>7</sub>: Intensity =  $16985608 \times \text{Concentration (ng/mL)} - 541201$  ( $R^2=0.9994$ ). The concentration of 1-OH Tc and 4-OH Tc in sample was calculated according to the standard curves of 1-OH Ta and 4-OH Ta, respectively.

(a) DMPO-OH in Fenton system

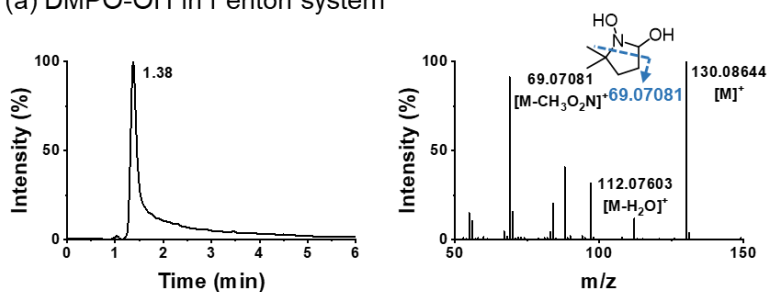

(b) DMPO-OH in Sample

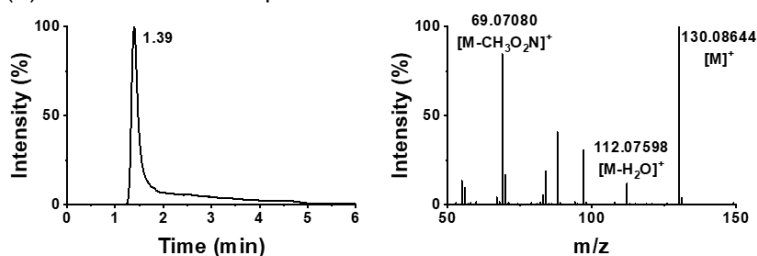

(c) Blank

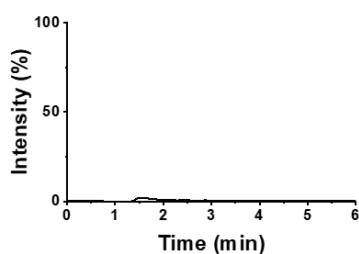

Figure S3. Radical OH standard in the Fenton-reaction system and the gas phase sample. (a) The peak of DMPO-OH generated through Fenton-reaction system was eluted at 1.38 min. Compared to this standard solution, the characteristic peak was also occurred (b) when using DMPO to capture the products of gas phase isoprene and OH in calibration source. The process blank (c) also indicated this peak was related to DMPO-OH.

(a) CHANT-OH in Fenton system

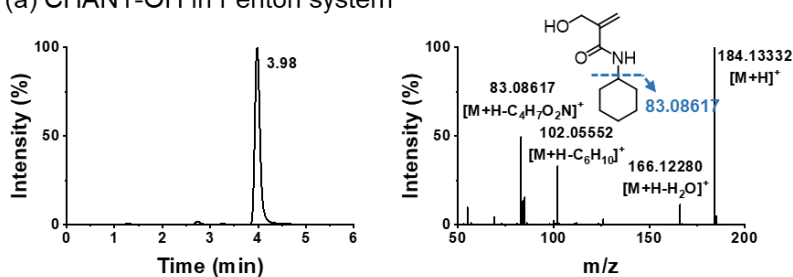

(b) CHANT-OH in Sample

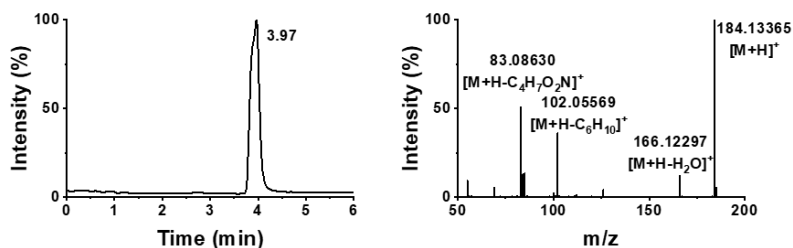

(c) Blank

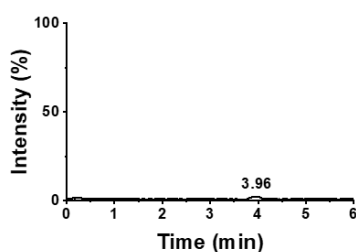

Figure S4. Radical OH standard in the Fenton-reaction system and the gas phase sample. (a) The peak of CHANT-OH generated through Fenton-reaction system was eluted at 3.98 min. Compared to this standard solution, the characteristic peak was also occurred (b) when using CHANT to capture the products of isoprene and OH in calibration source. The process blank (c) also indicated this peak was related to CHANT-OH.

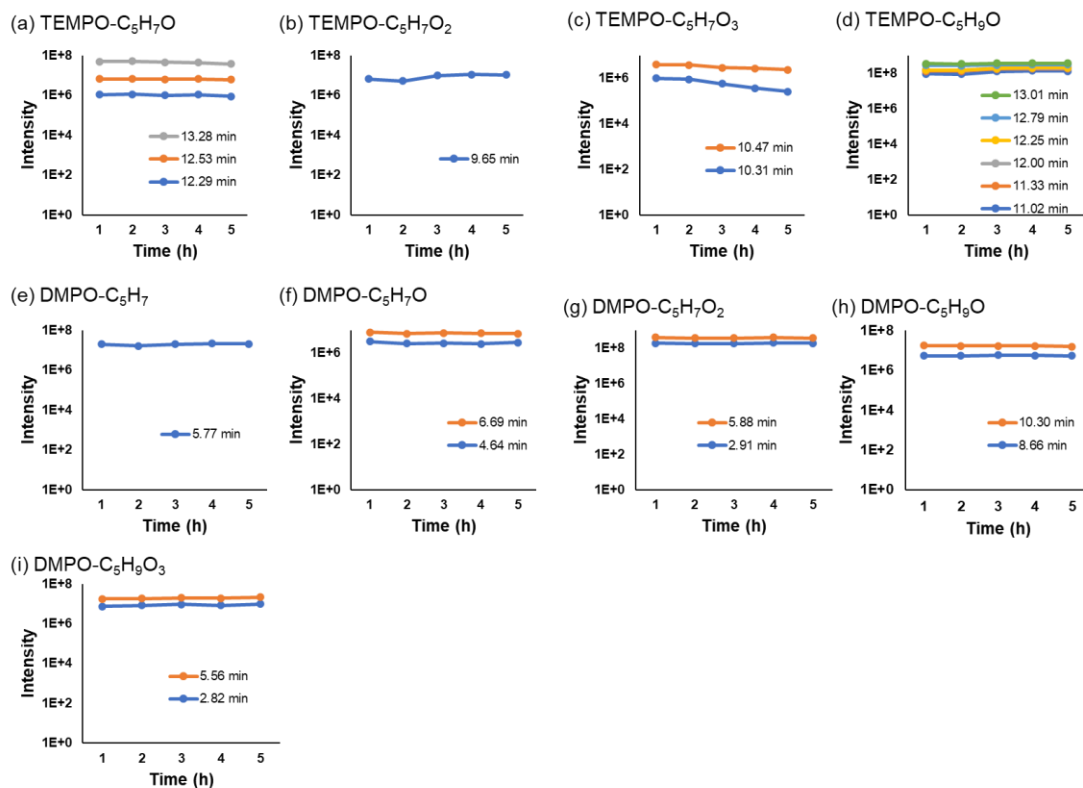

Figure S5. Stability of the captured compounds after elution. The elution solution was measured through nontargeted UPLC-MS analysis every hour, for a total of five measurements.

(a) Isomerization Process

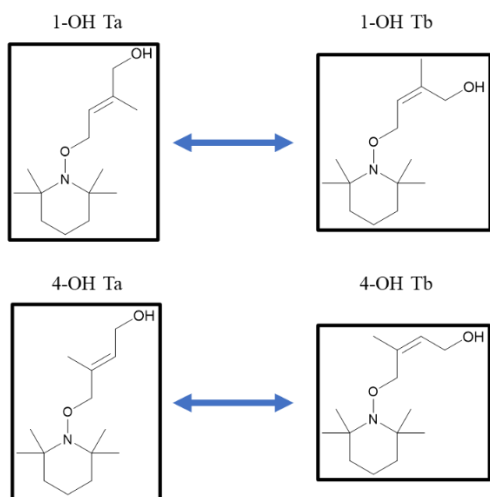

(b) Computational accuracy: ub3lyp/6-31+g(d,p)

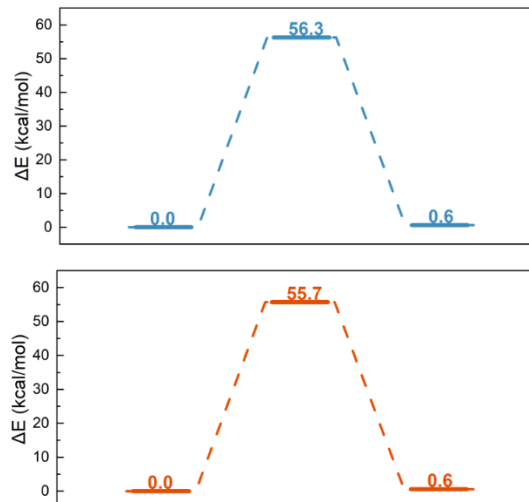

517

518 Figure S6. Structures were fully optimized at the UB3LYP-D3/6-31+G(d,p) level of theory. For

519 the isomerization reactions, vibrational frequency calculations were performed to make sure that

520 there is zero (one) imaginary frequency for minimum (transition state) structures. In addition,

521 intrinsic reaction coordinate (IRC) was performed at same level to check the connectivity among

522 reactant, product and transition state. All these calculations were performed using the Gaussian 16

523 program <sup>86</sup>. There is high energy base, ~55 kcal/mol, structure isomers in the elution would not

524 isomerize.

525

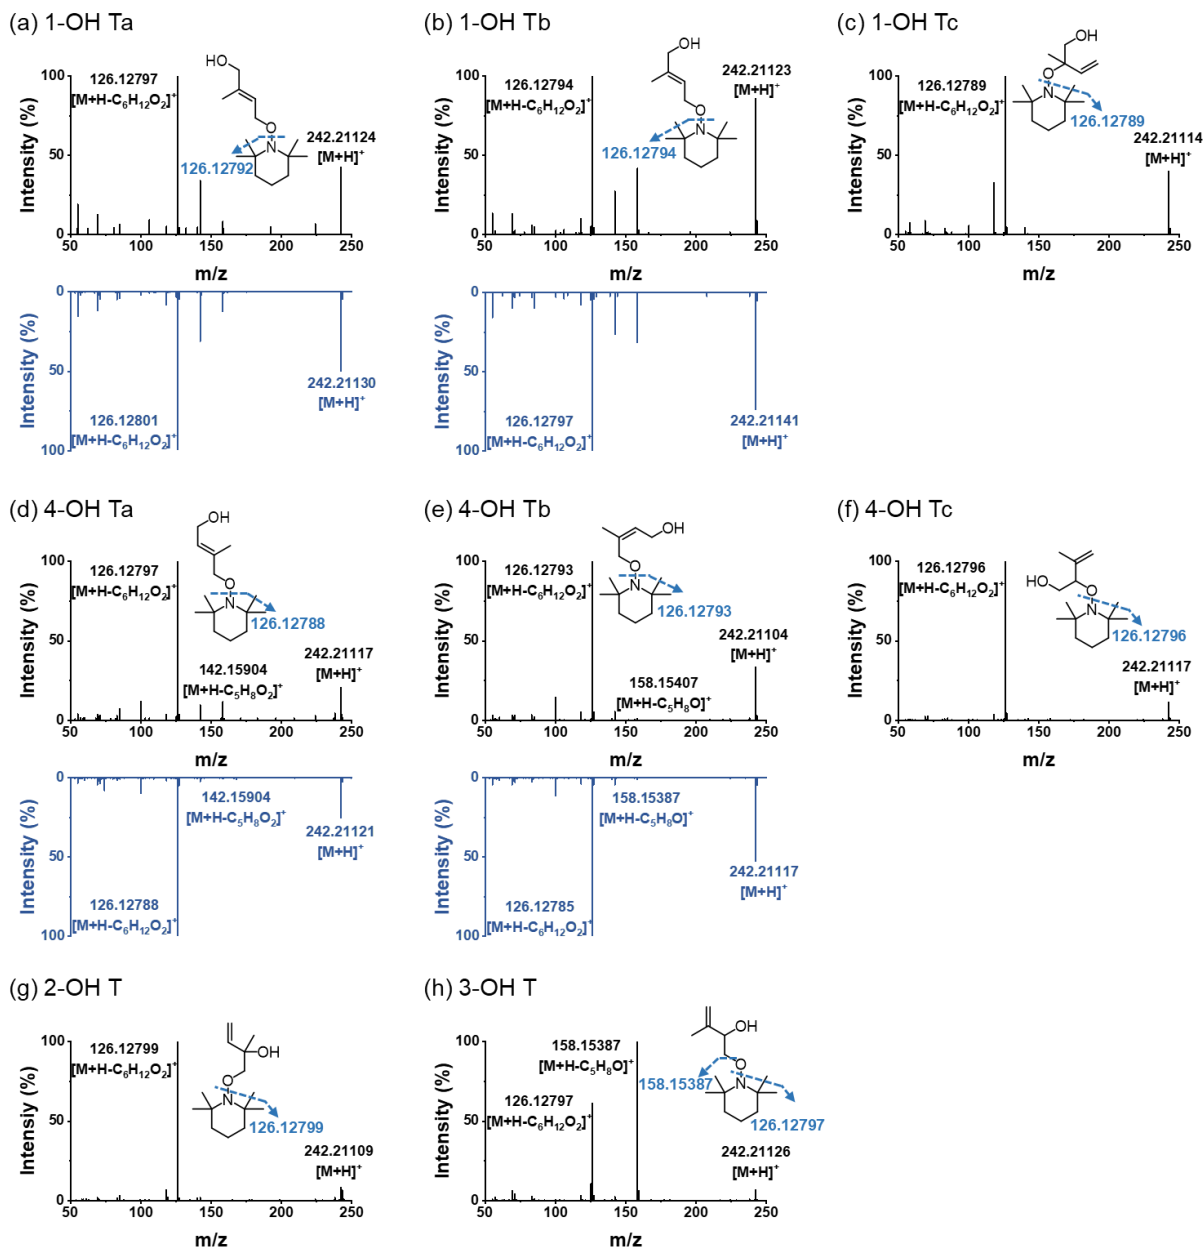

Figure S7. In order to identify the TEMPO-trapped products of compound  $C_5H_9O$  ( $[TEMPO-C_5H_9O+H]^+$ ,  $m/z = 242.21150$ ), the MS/MS spectrum for each peak was analyzed. No visible signal in the OFR experiments. The relative retention times (RT) of these adducts were further corroborated by their predicted LogP (octanol-water partition coefficient) values. (a-b) The TEMPO-trapped products of 1-OH Ta and 1-OH Tb was compared to the standard sample,

532 respectively. (c) The MS/MS analysis of TEMPO-trapped products of 1-OH Tc. (d-e) The  
533 TEMPO-trapped products of 4-OH Ta and 4-OH Tb was compared to the standard sample,  
534 respectively. (f-h) The MS/MS analysis of TEMPO-trapped products of 4-OH Tc, 2-OH T, and 3-  
535 OH T. The MS/MS analysis revealed that these peaks exhibited precursor ions with the expected  
536 molecular masses, along with characteristic product ions at  $m/z$  126.13 and 158.15, corresponding  
537 to the loss of the TEMPO from the trapped radical adducts.

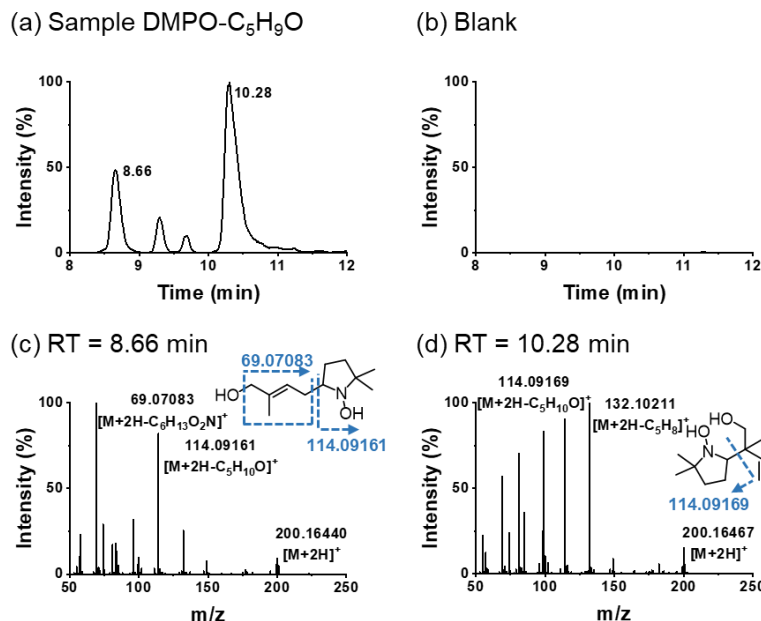

Figure S8. The DMPO-trapped adducts of C<sub>5</sub>H<sub>9</sub>O in the experiments of calibration source were analyzed as shown in (a). The [DMPO-C<sub>5</sub>H<sub>9</sub>O+2H]<sup>+</sup> (m/z = 200.16450) peaks were extracted, and their MS/MS spectra were examined. By comparison with the process blank (b) and based on precursor ion analysis, the peaks at 8.66 and 10.28 min were identified as major DMPO-trapped products. Two possible structures proposed as shown in (c) and (d). The MS/MS spectra displayed a dominant product ion at m/z 114.09, consistent with the dissociation of the DMPO from the radical adduct. All DMPO adducts in this study were analyzed and quantified using the [DMPO-R+2H]<sup>+</sup> ion signal. This is because DMPO-derived radical adducts can undergo disproportionation reactions in solution, resulting in the presence of both oxidized ([M]<sup>+</sup>) and reduced ([M+2H]<sup>+</sup>) forms. The relative abundance of [M]<sup>+</sup> and [M+2H]<sup>+</sup> formed by different adducts varies and depends on the type of radical trapped. Moreover, their retention times are also different, indicating that these species are chemically distinct entities already present in solution, rather than simply being products of protonation in the ion source<sup>99</sup>. Previous studies have shown that the proportion of the reduced [M+2H]<sup>+</sup> ion increases with the molecular size of the spin adduct, while the



oxidized form ( $[M]^+$ ) is generally only predominant for certain adducts such as DMPO-OH, which typically appears primarily as  $[M+H]^+$  in ESI-MS<sup>99,100</sup>. For the  $C_5H_7$  radical adduct, both  $[M]^+$  and  $[M+2H]^+$  ions were detected; however, the abundance of the  $[M]^+$  ion was much lower, accounting for only about 1% of the  $[M+2H]^+$  signal. Therefore, to ensure consistency and avoid confusion, only the  $[M+2H]^+$  extracted ion chromatograms and mass spectra are shown for all DMPO adducts in this work, except for OH radical.

(a) Sample CHANT-C<sub>5</sub>H<sub>9</sub>O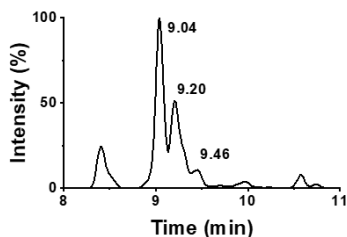

(b) Blank

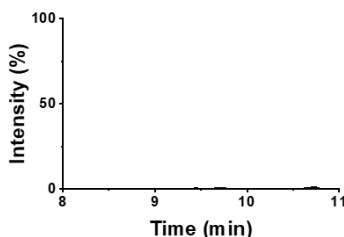

(c) RT = 9.04 min

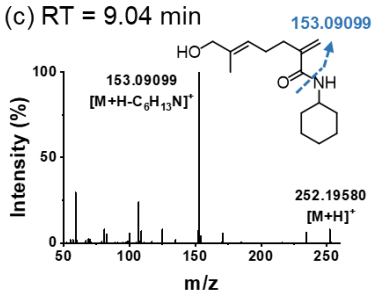

(d) RT = 9.20 min

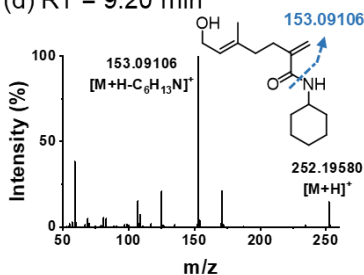

(e) RT = 9.46 min

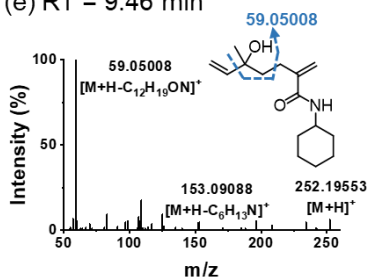

560

Figure S9. The CHANT-trapped adducts of C<sub>5</sub>H<sub>9</sub>O in the experiments of calibration source were analyzed as shown in (a). The [CHANT-C<sub>5</sub>H<sub>9</sub>O+H]<sup>+</sup> (m/z = 252.19580) peaks were extracted, and their MS/MS spectra were examined. By comparison with the process blank (b) and based on precursor ion analysis, the peaks at 9.04, 9.20 and 9.46 min were identified as major CHANT-trapped products. The possible structures proposed as shown in (c), (d) and (e). The MS/MS spectra displayed a dominant product ion at m/z 153.09, consistent with the dissociation of the CHANT from the radical adduct.

568

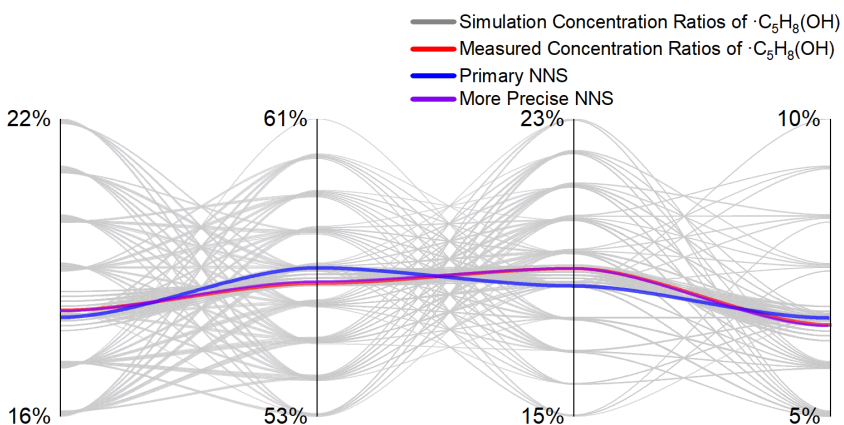

569

570 Figure S10. Based on up to 9751 routines of different branching ratios  $s$  of 1-OH trans, 1-OH cis,  
 571 4-OH trans and 4-OH cis radicals setting calculation, the Nearest Neighbor Search (NNS) of  
 572 modelled concentrations of  $\bullet\text{C}_5\text{H}_8(\text{OH})$  to measured ones was found at 0.172: 0.509:0.215:0.068.

573

574

(a) DMPO-C<sub>5</sub>H<sub>7</sub> in low O<sub>2</sub>

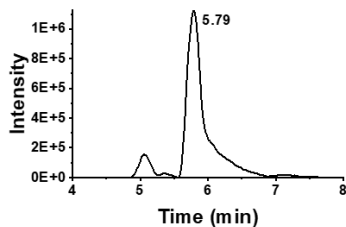

(b) DMPO-C<sub>5</sub>H<sub>7</sub> in high O<sub>2</sub>

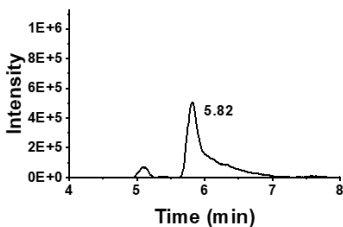

(c) Peak Area

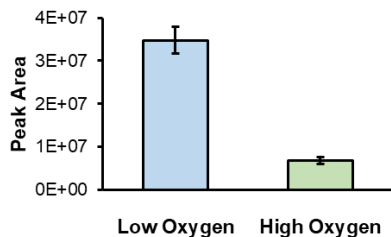

Figure S11. In order to compare the yield of compound C<sub>5</sub>H<sub>7</sub> under (a) low O<sub>2</sub> (under 0.1ppm) and (b) high O<sub>2</sub> (0.51ppm), the characteristic DMPO-C<sub>5</sub>H<sub>7</sub> ( $m/z = 182.15$ ) peaks were extracted respectively. The peak was eluted at (a) 5.79 min and (b) 5.82 was identified as the DMPO-trapped products. (c) The peak areas of the targeted product under different concentration of oxygen were compared.

(a) Sample CHANT-C<sub>5</sub>H<sub>7</sub>

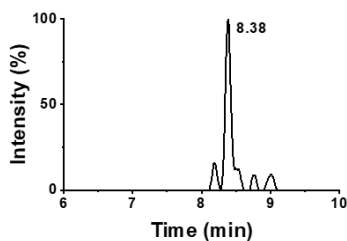

(b) Blank

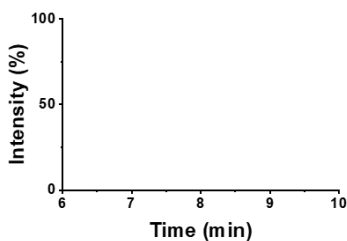

(c) RT = 8.38 min

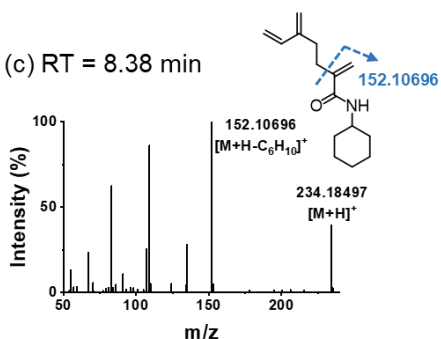

584

585 Figure S12. The CHANT-adducted product of C<sub>5</sub>H<sub>7</sub> generated from calibration source was  
586 identified through comparison between sample (a) and process blank (b) with isoprene but without  
587 uv photolysis. The peak at 8.38 min was identified as [CHANT-C<sub>5</sub>H<sub>7</sub>+H]<sup>+</sup> (m/z = 234.19). The  
588 MS/MS spectra displayed a dominant product ion at m/z 152.10696, consistent with the loss of  
589 C<sub>5</sub>H<sub>7</sub>.

590

591

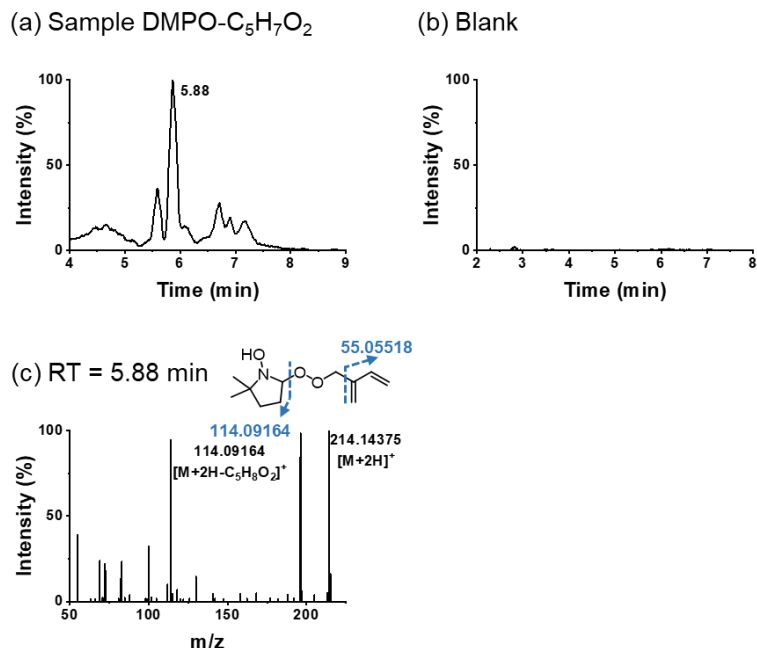

Figure S13. The DMPO-trapped adducts of C<sub>5</sub>H<sub>7</sub>O<sub>2</sub> generated from calibration source (a) were identified by comparison with process blank (b). The characteristic peaks, corresponding to [DMPO-C<sub>5</sub>H<sub>7</sub>O<sub>2</sub>+2H]<sup>+</sup> (m/z = 214.14), with retention time of 5.88 min was identified as the DMPO-trapped products. MS/MS analysis of this peak revealed the molecular mass of [DMPO-C<sub>5</sub>H<sub>7</sub>O<sub>2</sub>+2H]<sup>+</sup> as precursor ions. (c) In the MS/MS spectrum of the peak, regular and intense product ions with 114.09, and 55.06 were observed. The product ion of 114.09 was considered to cause a loss of DMPO in the DMPO trapped radicals. And the product ion of 55.06 was considered as the loss of a butadiene. No visible signals in the experiments from OFR which could be attributed to the prolonged resident time facilitating following reactions.

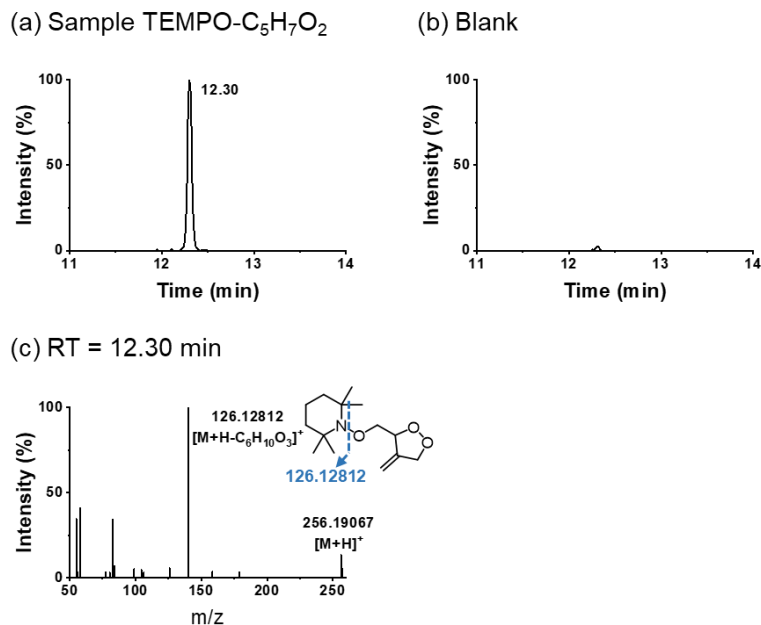

Figure S14. The TEMPO-adducted product of compound C<sub>5</sub>H<sub>7</sub>O<sub>2</sub> was identified through comparison between sample (a) and process blank (b) in the experiments of OFR. The characteristic [TEMPO-C<sub>5</sub>H<sub>7</sub>O<sub>2</sub>+H]<sup>+</sup> ion (m/z = 256.19) eluted at 12.30 min and was selected for MS/MS analysis. The fragmentation spectrum exhibited the precursor ion at the expected m/z 256.19, along with a dominant product ion at m/z 126.13, corresponding to characteristic TEMPO-derived fragments.

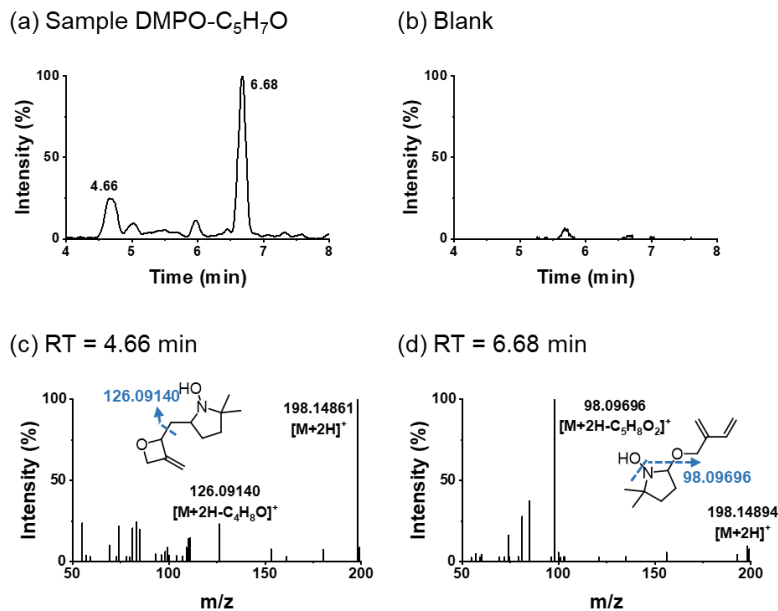

Figure S15. The DMPO-adducted product of C<sub>5</sub>H<sub>7</sub>O generated from calibration source was identified through comparison between sample (a) and process blank (b). The characteristic [DMPO-C<sub>5</sub>H<sub>7</sub>O+2H]<sup>+</sup> ion (m/z = 198.15) eluted at 4.66 and 6.68 min and were selected for MS/MS analysis. (c) In the MS/MS spectrum of the first peak, regular and intense product ion with 126.09 were observed, which was considered that the DMPO fragmentation in the product lost another hydroxyl group. (d) In the second peak, regular and intense product ion with 98.09 was considered as the DMPO fragmentation of adducts. No visible DMPO-trapped products of compound C<sub>5</sub>H<sub>7</sub>O were detected in the OFR experiments which could be attributed to the prolonged resident time facilitating following reactions.



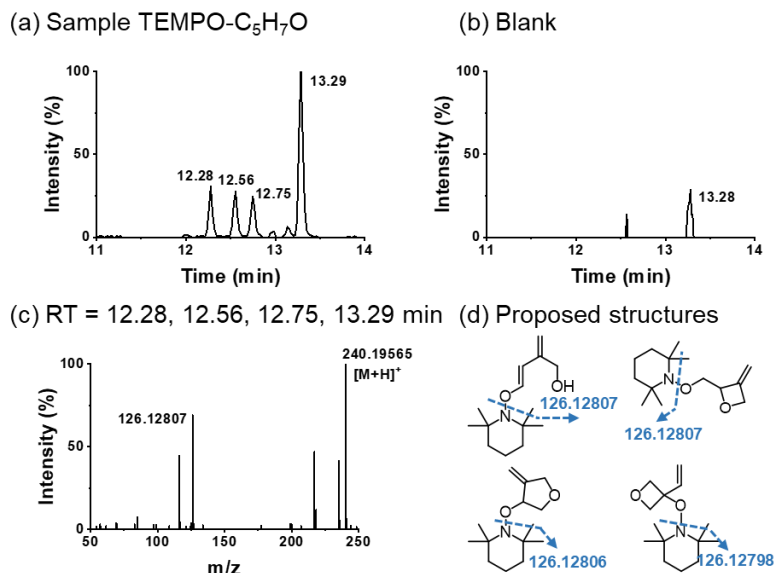

Figure S16. The TEMPO-adducted product of compound C<sub>5</sub>H<sub>7</sub>O generated from calibration source was identified through comparison between sample (a) and process blank (b). The characteristic [TEMPO-C<sub>5</sub>H<sub>7</sub>O+H]<sup>+</sup> ion (m/z = 240.20) eluted at 12.28, 12.56, 12.75 and 13.29 min was selected for MS/MS analysis. MS/MS analysis revealed that these peaks were similar to each other, and the MS/MS analysis of 13.29 was shown in (c). The peak exhibited precursor ions with the expected molecular masses, along with characteristic product ions at m/z 126.13, corresponding to the loss of the TEMPO fragmentation from the trapped radical adducts. (d) The proposed structures for TEMPO-C<sub>5</sub>H<sub>7</sub>O. No visible signals in the experiments from OFR which could be attributed to the prolonged resident time facilitating following reactions.

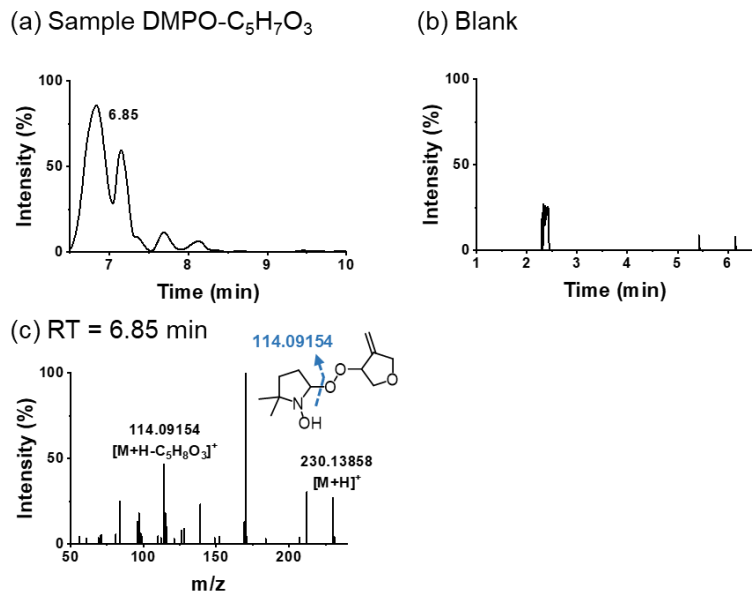

Figure S17. (a) The DMPO-adducted product of compound C<sub>5</sub>H<sub>7</sub>O<sub>3</sub> generated from OFR was identified through comparison between sample (a) and process blank (b). The characteristic [DMPO-C<sub>5</sub>H<sub>7</sub>O<sub>3</sub>+2H]<sup>+</sup> ion (m/z = 230.14) eluted at 6.85 min was selected for MS/MS analysis. The structures of the other peaks could not be inferred because of their low abundance which may due to the low concentration of poor sensitivity. No visible DMPO-trapped products of compound C<sub>5</sub>H<sub>7</sub>O<sub>3</sub> were detected in the calibration source experiments.

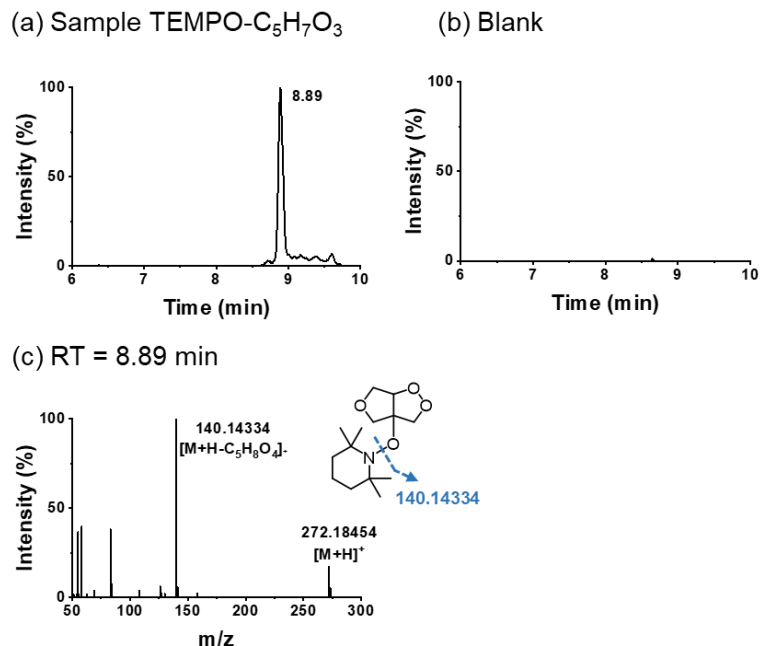

Figure S18. (a) The TEMPO-adducted product of compound C<sub>5</sub>H<sub>7</sub>O<sub>3</sub> from OFR was identified through comparison between sample (a) and process blank (b). The characteristic [TEMPO-C<sub>5</sub>H<sub>7</sub>O<sub>3</sub>+H]<sup>+</sup> ion (m/z = 272.19) eluted at 8.89 min was selected for MS/MS analysis. The structures of the other peaks could not be inferred because of their low abundance which may due to the low concentration of poor sensitivity. No visible TEMPO-trapped products of compound C<sub>5</sub>H<sub>7</sub>O<sub>3</sub> were detected in the calibration source experiments.

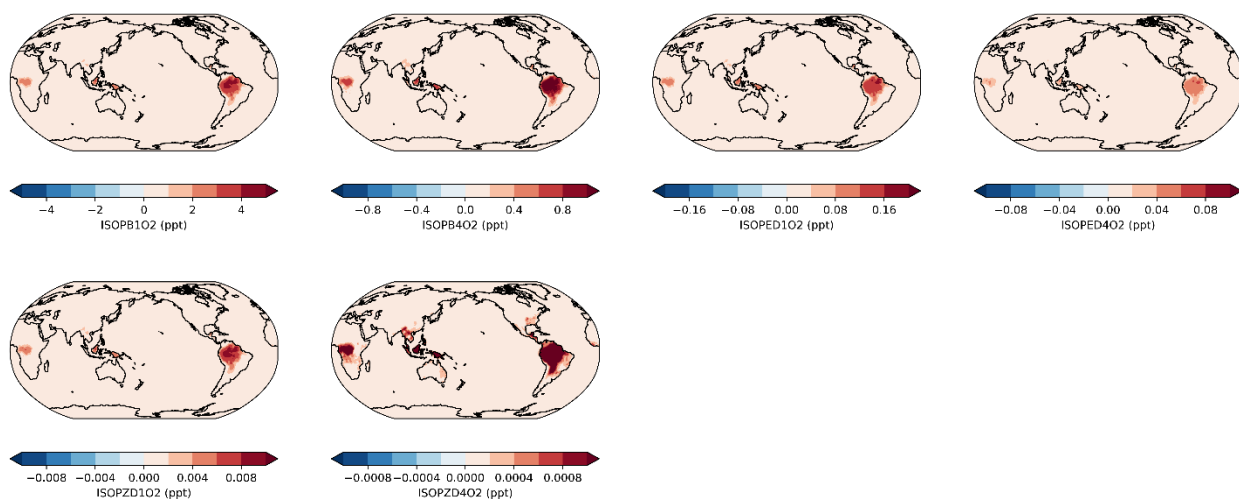

650

651 Figure S19. Spatial concentrations (in parts per trillion, ppt) of key isoprene-derived peroxy  
 652 radicals in base model simulations. From top left to bottom right, species include: ISOPB<sub>1</sub>O<sub>2</sub>,  
 653 ISOPB<sub>4</sub>O<sub>2</sub>, ISOPED<sub>1</sub>O<sub>2</sub>, ISOPED<sub>4</sub>O<sub>2</sub>, ISOPD<sub>1</sub>O<sub>2</sub> and ISOPD<sub>4</sub>O<sub>2</sub><sup>98</sup>.

654

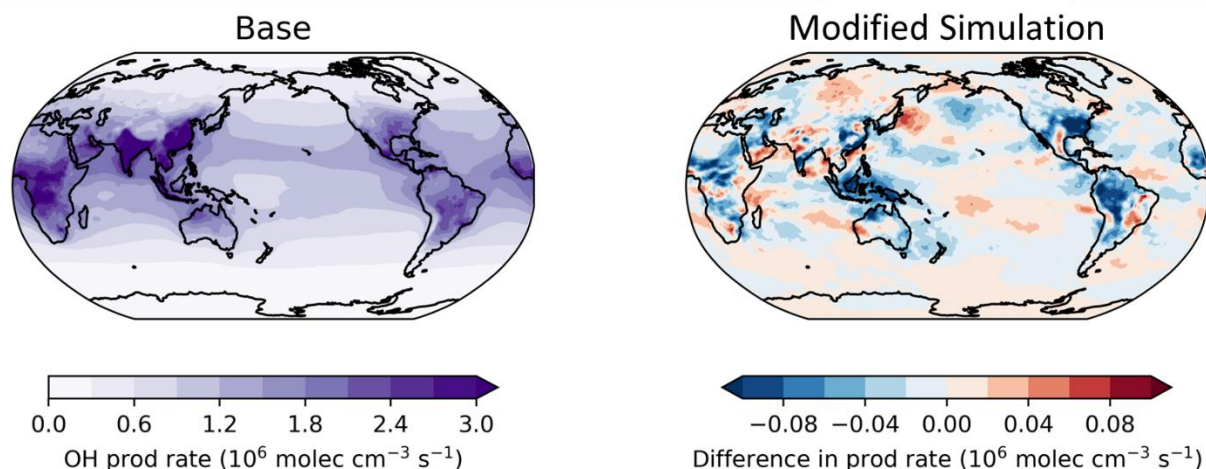

Figure S20. Global OH production rates and their differences between baseline and modified simulations. The left panel shows the simulated annual mean hydroxyl radical (OH) production rate (in  $10^6$  molecules  $\text{cm}^{-3}$   $\text{s}^{-1}$ ) for the baseline simulation, while the right panel displays the difference between the modified and baseline simulations. Blue areas in the difference map represent regions with reduced OH production, and red areas indicate increased production. Significant changes are observed over eastern China, the United States, and the Amazon, reflecting the impact of the newly modified branching ratio and pathway of H-abstraction mechanisms on atmospheric oxidizing capacity.

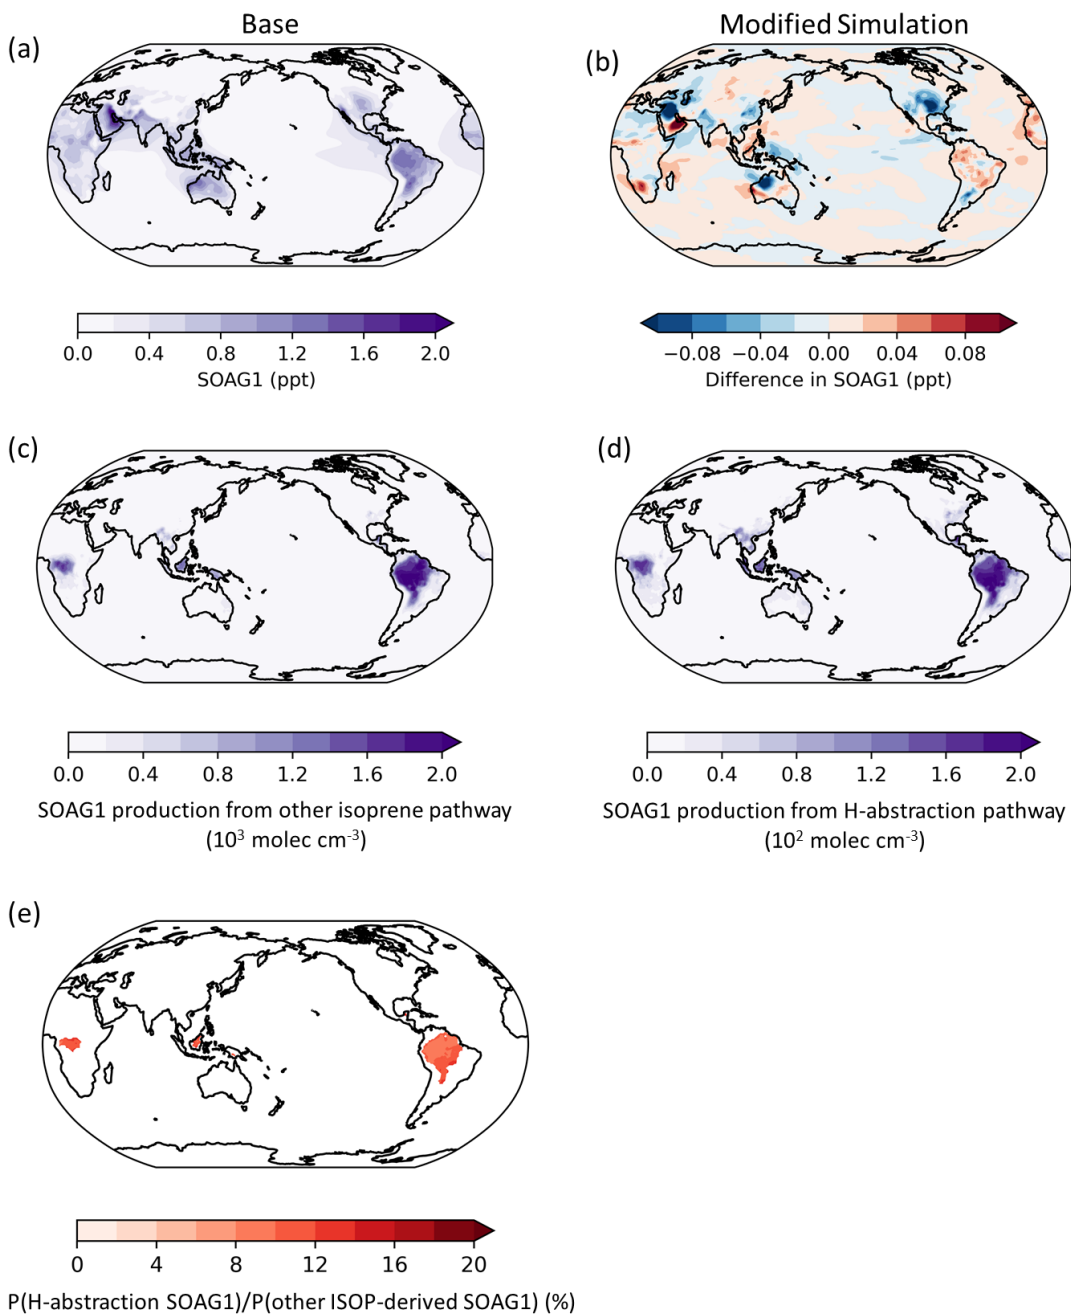

665

666 Figure S21. The source contributions of simulated low-volatility secondary organic aerosol  
 667 SOAG1 concentrations. (a) SOAG1 concentration (ppt). (b) Difference in SOAG1 concentration  
 668 in the modified simulation. (c) SOAG1 production from other isoprene-derived pathways exclude  
 669 H-abstraction pathway ( $10^3 \text{ molec cm}^{-3}$ ). (d) SOAG1 production attributed to hydrogen abstraction

pathway ( $10^3 \text{ molec cm}^{-3}$ ). (e) The ratio of these two production pathways' SOAG1 contribution (%) . In BVOC abundant regions the ratio is 9.0 - 15.6% with a regional average value of 10.5%. The results highlight the potential contribution of SOA from the abstraction channel.

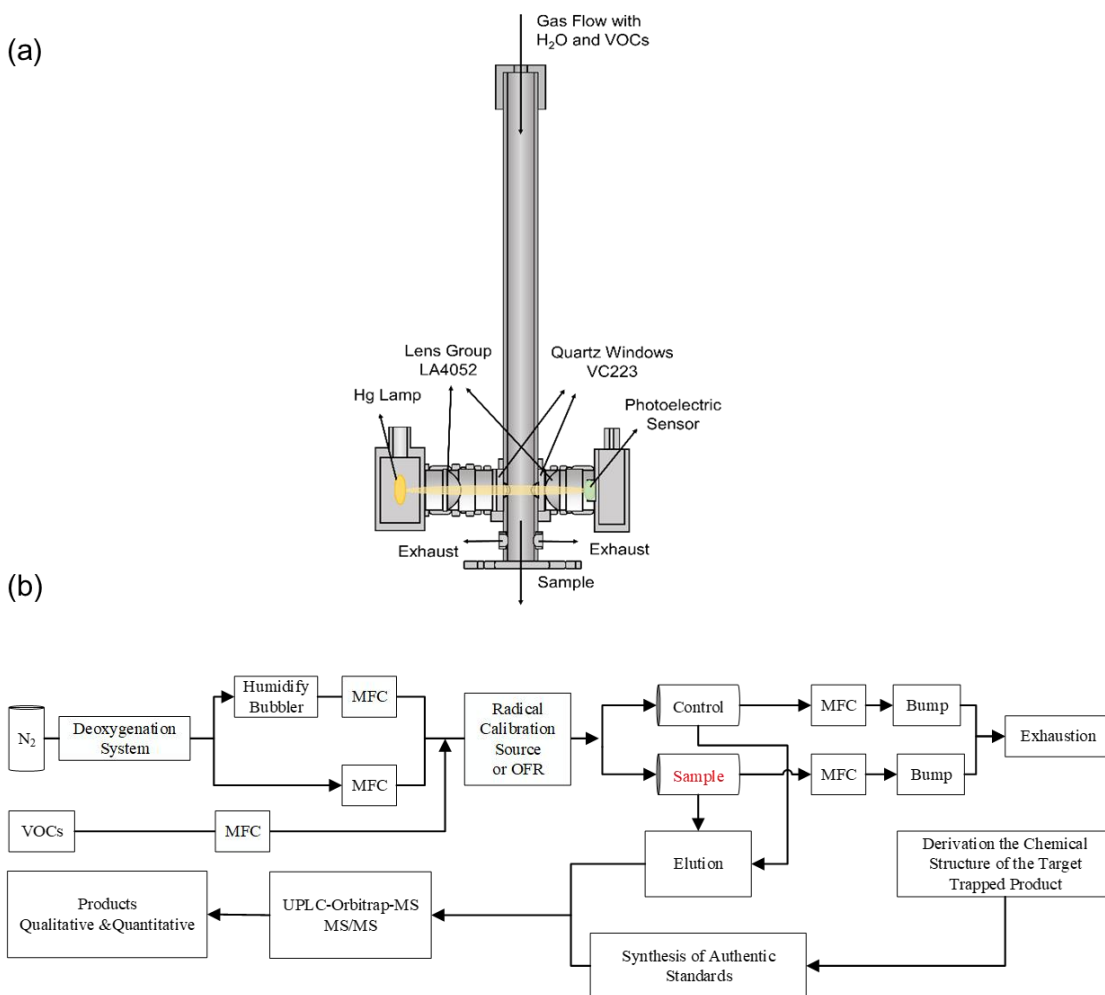

Figure S22. (a) Schematic of the custom-built radical calibration source used in the experiments. Target compounds are mixed with OH precursors and photolyzed in a reaction cell under controlled flow conditions. The system includes mass flow controllers (MFCs), a deoxygenation unit, and a UV photolysis source for OH generation. The resulting radicals are immediately

679 captured by spin-trapping agents (e.g., TEMPO, DMPO) on a solid-phase substrate. The adducts  
680 are subsequently eluted and analyzed via high-resolution mass spectrometry to provide reference  
681 spectra for compound identification and quantification. (b) Overview of the full experimental  
682 workflow for gas-phase radical detection in the OH-initiated oxidation of isoprene. The system  
683 integrates the radical generation reactor (e.g., oxidation flow reactor), radical capture using solid-  
684 phase substrates, and subsequent UHPLC–HRMS analysis. Trapping agents selectively stabilize  
685 reactive intermediates, enabling structural identification and quantification of short-lived radicals  
686 involved in the early-stage oxidation mechanisms.

687

688



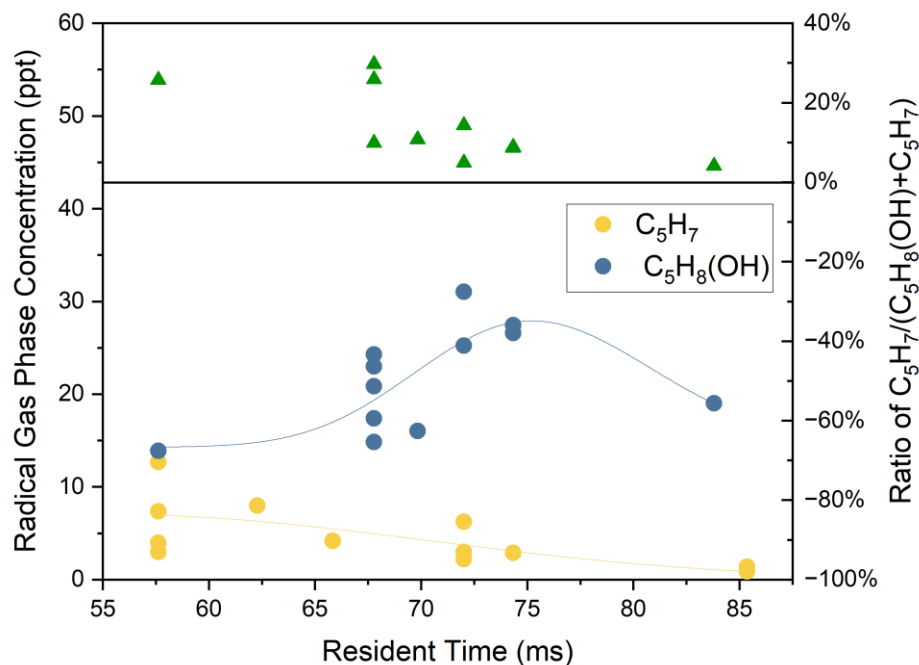

689  
 690 Figure S23. The concentration of  $\bullet C_5H_7$  increased with decreasing residence time (RT) shown in  
 691 the yellow dots and the concentration of  $\bullet C_5H_8(OH)$  shown an insignificant upward and then  
 692 downward trend with RT as illustrated in blue dots. Their ratio decreases from 29.68% to 4.15%  
 693 as shown in the green triple dots. The presence of polar substituents (e.g.,  $-OH$ ,  $-COOH$ ) increases  
 694 the polarity of the radical center and can enhance the cross-coupling reaction rate between a  
 695 nitroxide (such as TEMPO) and a C-centered radical. For  $\bullet C_5H_7$  radicals, the higher reaction rate  
 696 with  $O_2$  compared to TEMPO may result in the absence of detectable TEMPO adduct signals in  
 697 this study. In contrast, spin traps such as DMPO and CHANT may exhibit higher trapping rates  
 698 with  $\bullet C_5H_7$  radicals, thereby facilitating their detection.

### S3. Tables S1 to S6

Table S1. The quantum chemical calculations helped to assessed the contributions of cis- and trans-radicals to struc-8 and struc-9. All rate constant calculations k were performed using a Master Equation Solver for Multi Energy-well Reactions (MESMER) code <sup>87</sup>.

| Reaction rates (s <sup>-1</sup> ) |                     |            |                    |
|-----------------------------------|---------------------|------------|--------------------|
| 1-OH Tc                           |                     | 4-OH Tc    |                    |
| 1-OH cis                          | 49249.55<br>(49.4%) | 4-OH cis   | 47134.4<br>(51.7%) |
| 1-OH trans                        | 50380.45<br>(50.6%) | 4-OH trans | 44003.1<br>(48.3%) |

Table S2. Summary of the newly implemented oxidation mechanism for the H-abstraction pathway, including product branching and rate constants. This mechanism incorporates hydrogen abstraction by OH and subsequent peroxy radical chemistry.

| Reaction                                                                                                                                                                                            | Rate                                                    |
|-----------------------------------------------------------------------------------------------------------------------------------------------------------------------------------------------------|---------------------------------------------------------|
| $\text{ISOP} + \text{OH} \rightarrow 0.482 \text{ ISOPC}_1\text{T} + 0.163 \text{ ISOPC}_1\text{C} + 0.064 \text{ ISOPC}_4\text{T} + 0.203 \text{ ISOPC}_4\text{C} + 0.088 \text{ ISOPC}_1\text{H}$ | $2.70\text{e-}11 \text{ exp}(390.00/t)$                 |
| $\text{ISOPC}_1\text{H} + \text{O}_2 \rightarrow \text{C}_5\text{H}_7\text{O}_2$                                                                                                                    | $1\text{e-}12$                                          |
| $\text{C}_5\text{H}_7\text{O}_2 \rightarrow \text{C}_5\text{H}_7\text{O}_6$                                                                                                                         | $0.077$                                                 |
| $\text{C}_5\text{H}_7\text{O}_6 + \text{NO} \rightarrow 0.0035 \text{ SOAG}_1$                                                                                                                      | $1.1\text{e-}11$                                        |
| $\text{C}_5\text{H}_7\text{O}_6 \rightarrow \text{HCHO} + \text{CO} + \text{HO}_2 + \text{C}_3\text{H}_4\text{O}_4$                                                                                 | $0.3$                                                   |
| $\text{C}_3\text{H}_4\text{O}_4 \rightarrow \text{SOAG}_1$                                                                                                                                          | $3.5 \times 10^{-3}$                                    |
|                                                                                                                                                                                                     | $(8.2 \times 10^{-3} \text{ to } 5.8 \times 10^{-5})^a$ |

<sup>a</sup> The reaction rate was calculated under the typical ambient conditions as 5 to 287 min<sup>101</sup> of glyoxal heterogeneous reactions, with the aid of uptake coefficient as 0.0002<sup>98</sup> to 0.0033<sup>92,102</sup> with typical aerosol surface area as  $3 \times 10^{-4} \text{ cm}^2/\text{cm}^3$  and mean molecular speed as  $3.3 \times 10^4 \text{ cm/s}$ . We assume that all glyoxal that is taken up by aerosol particles is irreversibly converted into SOA (i.e., 100% yield upon uptake), consistent with common treatments in global and regional chemical transport models (e.g., GEOS-Chem, MOZART, and CAM-Chem)<sup>103</sup>.

Table S3. The mean wall loss rates and fractions of different species in the calibration source. We assumed that  $k_{\text{wall}2}$  played a role in the whole oxidant period which was in fact not true, the wall effect from the junction between the calibration source and the solid phase column inlet may only account for less than 10% period. The wall loss fractions are the upper limit.

| Species              | $D_g$<br>( $\text{cm}^2 \text{ s}^{-1}$ ) | $k_{\text{wall}1}$<br>( $\text{s}^{-1}$ ) | $k_{\text{wall}2}$<br>( $\text{s}^{-1}$ ) | Production rate<br>( $\text{molecule cm}^3 \text{ s}^{-1}$ ) | Wall loss rate<br>( $\text{molecule cm}^3 \text{ s}^{-1}$ ) | Wall loss fraction |
|----------------------|-------------------------------------------|-------------------------------------------|-------------------------------------------|--------------------------------------------------------------|-------------------------------------------------------------|--------------------|
| OH                   | 0.23                                      | 0.047                                     | 0.960                                     | $1.12 \times 10^{10}$                                        | $8.59 \times 10^7$                                          | 0.77%              |
| HO <sub>2</sub>      | 0.15                                      | 0.038                                     | 0.626                                     | $5.95 \times 10^8$                                           | $3.37 \times 10^7$                                          | 5.66%              |
| ISO-R<br>(estimated) | 0.07                                      | 0.026                                     | 0.292                                     | $1.04 \times 10^{10}$                                        | $2.35 \times 10^8$                                          | 2.26%              |
| ISO-RO <sub>2</sub>  | 0.07                                      | 0.026                                     | 0.292                                     | $2.24 \times 10^9$                                           | $2.53 \times 10^7$                                          | 1.13%              |

Table S4. The wall loss rates and fractions of different species in the OFR. We assumed that  $k_{\text{wall}2}$  played a role in the whole oxidant period which was in fact not true, the wall effect from the junction between the calibration source and the solid phase column inlet may only account for less than 10% period. The wall loss fractions are the upper limit.

| Species         | $D_g$<br>( $\text{cm}^2 \text{ s}^{-1}$ ) | $k_{\text{wall}1}$<br>( $\text{s}^{-1}$ ) | $k_{\text{wall}2}$<br>( $\text{s}^{-1}$ ) | Production rate<br>( $\text{molecule cm}^3 \text{ s}^{-1}$ ) | Wall loss rate<br>( $\text{molecule cm}^3 \text{ s}^{-1}$ ) | Wall loss fraction |
|-----------------|-------------------------------------------|-------------------------------------------|-------------------------------------------|--------------------------------------------------------------|-------------------------------------------------------------|--------------------|
| OH              | 0.23                                      | 0.0050                                    | 0.960                                     | $9.05 \times 10^{11}$                                        | $1.62 \times 10^8$                                          | 0.017%             |
| HO <sub>2</sub> | 0.15                                      | 0.0040                                    | 0.626                                     | $6.88 \times 10^{11}$                                        | $1.53 \times 10^{10}$                                       | 2.22%              |
| R               | 0.07<br>(estimated)                       | 0.0027                                    | 0.292                                     | $5.36 \times 10^{11}$                                        | $8.89 \times 10^8$                                          | 0.17%              |
| RO <sub>2</sub> | 0.07                                      | 0.0027                                    | 0.292                                     | $5.48 \times 10^{11}$                                        | $2.46 \times 10^9$                                          | 0.45%              |

Table S5. Relative uncertainties in calibration-derived radical concentrations. The value of  $F \times t$  is  $1.08 \times 10^{12}$ . The correlation equation of  $[\text{OH}]_{\text{count}}$  with the concentration of OH is  $[\text{OH}] = 1.83 \times 10^7 \times [\text{OH}]_{\text{count}}$ ,  $R^2 = 0.997$ . Thus, the correlation of RH with  $[\text{OH}]$  in the condition of low oxygen ( $< 0.1 \text{ ppm}$ ) and  $20 \text{ L/min}$  flow is  $[\text{OH}] = -6.12 \times 10^6 \times \text{RH}^2 + 1.06 \times 10^9 \times \text{RH} - 3.60 \times 10^9$ ,  $R^2 = 0.998$ . The non-linear correlation between them is attributed to the interferences of water vapor on the photolysis and reaction with OH.

| Parameter                          | Value                               | Uncertainty ( $1\sigma$ ) |
|------------------------------------|-------------------------------------|---------------------------|
| $\sigma_{\text{water}}$            | $7.1 \times 10^{-20} \text{ cm}^2$  | 3%                        |
| $\varphi_{\text{OH}+\text{H}}$     | 1.0                                 | $< 0.5\%$                 |
| $[\text{O}_2]$                     | 6.75%                               | 2.5%                      |
| $\sigma_{\text{O}_2}^{\text{eff}}$ | $1.63 \times 10^{-20} \text{ cm}^2$ | 2%                        |
| RH                                 | 0.1-0.6                             | 0.5%                      |
| Total                              |                                     | 6.67%                     |

736 Table S6. Tropospheric airmass-weighted concentrations of key oxidants, isoprene oxidation  
737 intermediates, and SOA-related species from global simulations. Columns report values from the  
738 base simulation, the modified simulation including the changing of branching ratio and addition  
739 of H-abstraction pathway, and the absolute difference between them. All values are airmass-  
740 weighted tropospheric averages; species marked as "new added" were absent from the base  
741 simulation. Units are in parts per trillion (ppt), except for SOA1, which is expressed in  $10^{-11}$  kg  
742 per kg of air.

|                          | Base   | Modified | Difference |
|--------------------------|--------|----------|------------|
| OH (ppt)                 | 0.077  | 0.077    |            |
| HO <sub>2</sub> (ppt)    | 5.61   | 5.59     | -0.02      |
| IEPOX (ppt)              | 6.38   | 5.92     | -0.47      |
| Isoprene (ppt)           | 43.6   | 44.8     |            |
| SOAG1 (ppt)              | 0.19   | 0.19     |            |
| SOA1 ( $10^{-11}$ kg/kg) | 6.97   | 6.94     |            |
| ISOPC1T (ppt)            | 2.5e-8 | 2.5e-8   |            |
| ISOPC1C (ppt)            | 4.6e-9 | 4.5e-9   |            |

|                                                                  |         |         |         |
|------------------------------------------------------------------|---------|---------|---------|
| ISOPC4T (ppt)                                                    | 1.4e-9  | 9.4e-10 |         |
| ISOPC4C (ppt)                                                    | 7.0e-10 | 4.8e-10 |         |
| ISOPC1H (ppt), new<br>added                                      | N/A     | 2.5e-11 |         |
| <hr/>                                                            |         |         |         |
| ISOPB <sub>1</sub> O <sub>2</sub> (ppt)                          | 0.096   | 0.096   |         |
| ISOPB <sub>4</sub> O <sub>2</sub> (ppt)                          | 0.027   | 0.019   | -0.008  |
| ISOPED <sub>1</sub> O <sub>2</sub> (ppt)                         | 0.0039  | 0.0039  |         |
| ISOPED <sub>4</sub> O <sub>2</sub> (ppt)                         | 0.0015  | 0.00097 | -0.0005 |
| ISOPZD <sub>1</sub> O <sub>2</sub> (ppt)                         | 0.0002  | 0.0002  |         |
| ISOPZD <sub>4</sub> O <sub>2</sub> (ppt)                         | 6.7e-5  | 4.5e-5  | -2.0e-5 |
| C <sub>5</sub> H <sub>7</sub> O <sub>2</sub> (ppt), new<br>added | N/A     | 0.0014  |         |
| C <sub>5</sub> H <sub>7</sub> O <sub>6</sub> (ppt), new<br>added | N/A     | 0.0003  |         |
| <hr/>                                                            |         |         |         |



|                             |       |       |        |
|-----------------------------|-------|-------|--------|
| RO <sub>2</sub> total (ppt) | 0.128 | 0.121 | -0.007 |
|-----------------------------|-------|-------|--------|

743

744

745

**S4. Synthetic Procedures and Characterization Data and Figs. S24 to S28**

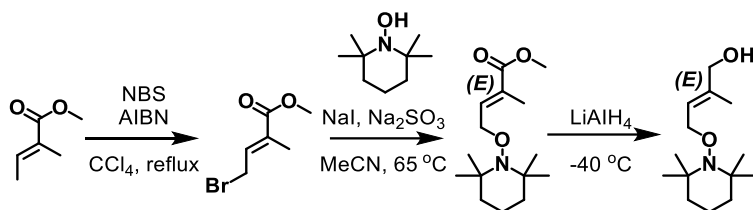

Scheme S1. Synthetic process of (E)-2-methyl-4-((2,2,6,6-tetramethylpiperidin-1-yl)oxy)but-2-en-1-ol (1-OH-TEMPO adducts).

(E)-2-methyl-4-((2,2,6,6-tetramethylpiperidin-1-yl)oxy)but-2-en-1-ol was prepared according to Scheme 1. To a stirred solution of methyl (E)-2-methylbut-2-enoate in  $\text{CCl}_4$  was added NBS and a catalytic amount of AIBN. The mixture solution was heated to reflux and maintained for several hours. After the reaction was completed, the mixture solution was cooled to the room temperature, and filtered to remove the byproduct and to get methyl (E)-4-bromo-2-methylbut-2-enoate. The purified product from the previous step was dissolved in acetonitrile with NaI,  $\text{Na}_2\text{SO}_3$ , and TEMPO. The mixture solution was stirred at 65 °C for several hours and cooled to room temperature after the reaction was completed, and then, methyl (E)-2-methyl-4-((2,2,6,6-tetramethylpiperidin-1-yl)oxy)but-2-enoate was obtained. Finally, the purified product from the previous step was reacted with  $\text{LiAlH}_4$  at -40 °C, and was reduced to obtain target compound.

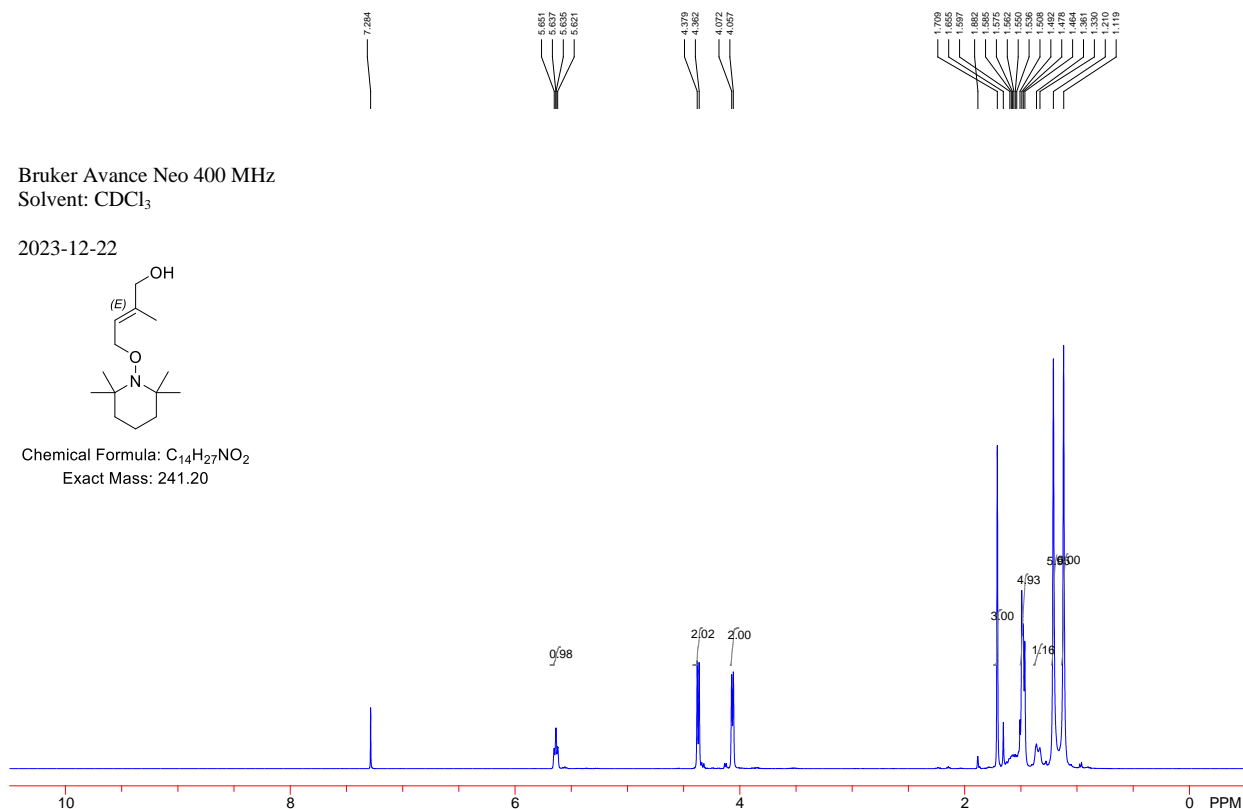

Figure. S24 The HRMS of 1-OH-TEMPO adducts.

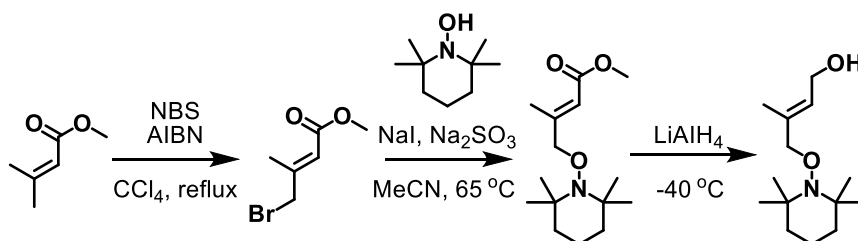

Scheme S2. (E)-3-methyl-4-((2,2,6,6-tetramethylpiperidin-1-yl)oxy)but-2-en-1-ol (4-OH-TEMPO adducts)

(E)-3-methyl-4-((2,2,6,6-tetramethylpiperidin-1-yl)oxy)but-2-en-1-ol was obtained according to Scheme 2. First, to a stirred solution of methyl 3-methylbut-2-enoate in  $CCl_4$  was added NBS, and AIBN, and the mixture solution was heated to reflux and maintained for several hours. Methyl (E)-4-bromo-3-methylbut-2-enoate was obtained after reaction and purification, which was then

dissolved in MeCN with TEMPO, NaI, and Na<sub>2</sub>SO<sub>3</sub>, and heated to 65 °C. After cooling to room temperature, methyl (E)-3-methyl-4-((2,2,6,6-tetramethylpiperidin-1-yl)oxy)but-2-enoate was obtained. Finally, the product from the previous step was reduced by LiAlH<sub>4</sub> at -40 °C to get target compound.

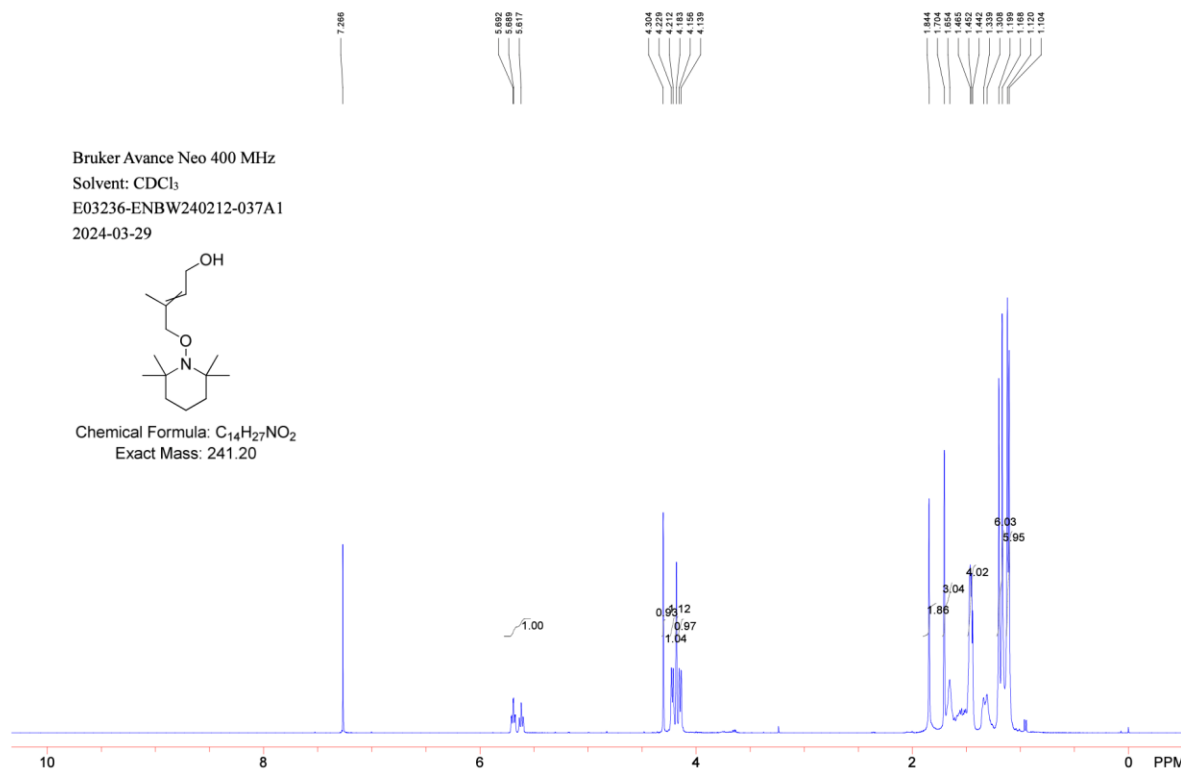

Figure S25 The HRMS of 4-OH-TEMPO adducts.

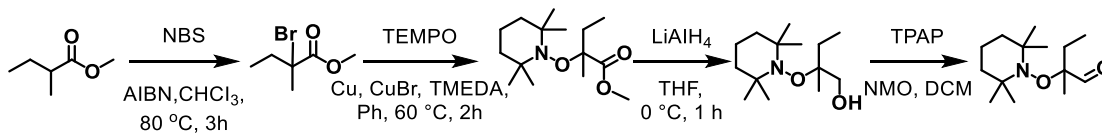

Scheme S3. 2-methyl-2-((2,2,6,6-tetramethylpiperidin-1-yl)oxy)butanal (Structure 7)

2-methyl-2-((2,2,6,6-tetramethylpiperidin-1-yl)oxy)butanal (Structure 7) was prepared according to Scheme 3. To a stirred solution of methyl 2-methylbutanoate in  $\text{CHCl}_3$  was added NBS and a catalytic amount of AIBN. The mixture solution was stirred for 3 h at 80 °C. After the reaction was completed, the mixture solution was purified by silical gel column to get methyl 2-bromo-2-methylbutanoate, and the structure was confirmed by  $^1\text{H-NMR}$ . Then, the product was dissolved in benzene with TEMPO, Cu, CuBr, and TMEDA and was stirred for 2 h at 60 °C to get methyl 2-methyl-2-((2,2,6,6-tetramethylpiperidin-1-yl)oxy)butanoate. After purification by silical gel column, the product and  $\text{LiAlH}_4$  was added into THF and the reaction temperature was maintained at 0 °C for 1 h to get 2-methyl-2-((2,2,6,6-tetramethylpiperidin-1-yl)oxy)butan-1-ol. After purification, TPAP, NMO, and product from the previous step was dissolved in DCM to obtain the oxidation product, Structure 7. MS (ES,  $m/z$ ):  $[\text{M}+1]^+ = 241.8$ .  $^1\text{H-NMR}$  (400 MHz,  $\text{DMSO}-d_6$ ): 9.713 (s, 1H), 1.945-1.935 (m, 2H), 1.773-1.706(m, 2H), 1.628-1.422 (m, 4H), 1.315 (s, 3H), 1.195 (s, 3H), 1.162 (s, 3H), 1.109 (s, 3H), 0.914 (s, 3H), 0.835 (t, 3H).

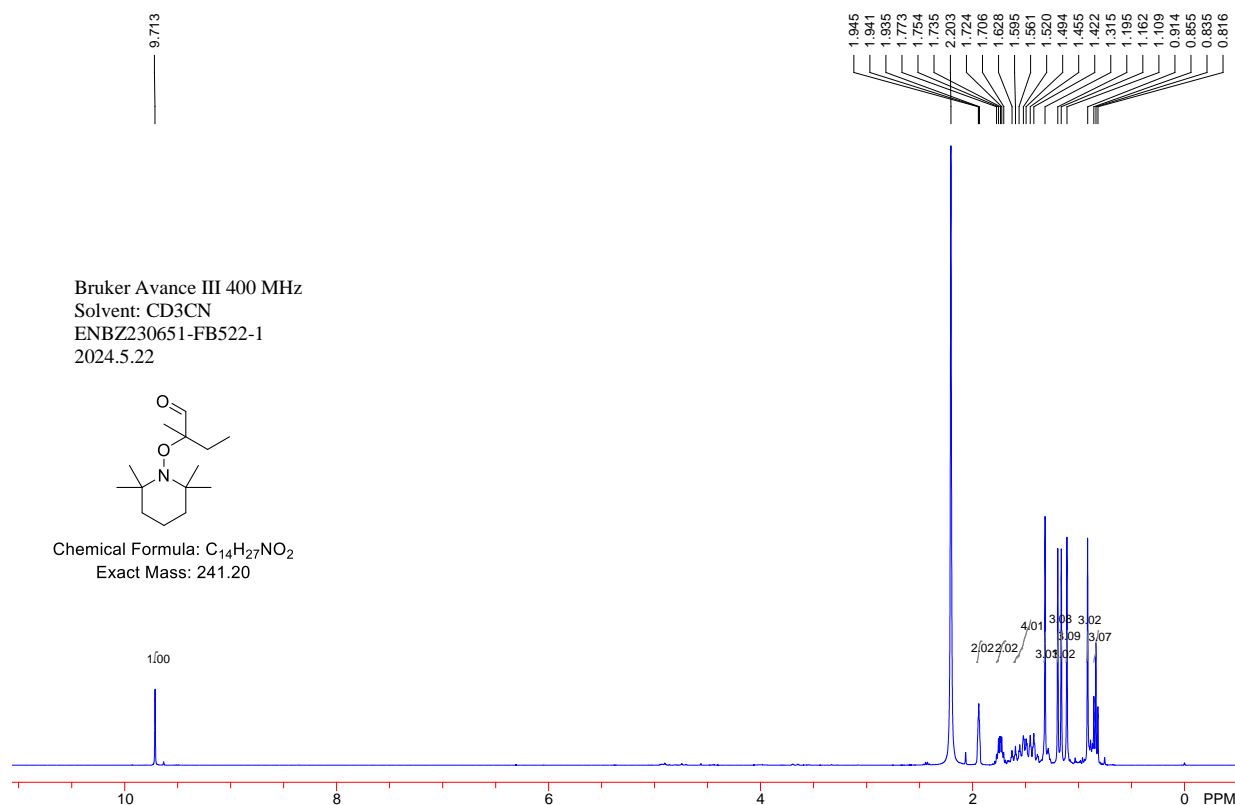

Figure S26. The HRMS of structure 7.

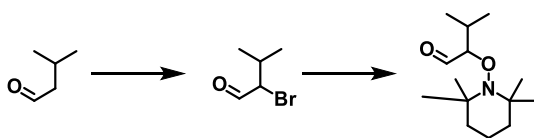

Scheme S4. 3-methyl-2-((2,2,6,6-tetramethylpiperidin-1-yl)oxy)butanal (Structure 11)

To a stirred solution of TEMPO (1 g, 6.40 mmol, 1.0 eq.) in MeCN (10.0 mL) was added Ru(bpy)<sub>3</sub>(PF<sub>6</sub>)<sub>2</sub> (110 mg, 0.13 mmol, 0.02 eq.), morpholine (28 mg, 0.32 mmol, 1.0 eq.), 3-methylbutanal (1.10 g, 12.80 mmol, 2.0 eq.) and stirred for 16 h under 435nm blue LED. The mixture was purified by reverse column (MeCN : NH<sub>4</sub>HCO<sub>3</sub>=0 to 100%) to give **Structure 11**

800 (150 mg, 9.74%) as a pale yellow liquid. MS (ES, m/z):  $[M+1]^+ = 241.8$ .  $^1\text{H}$ -NMR (400 MHz,  
 801 DMSO- $d_6$ ): 9.853 (d,  $J=5.2\text{Hz}$ , 1H), 3.868-3.838 (m, 1H), 2.175-2.089 (m, 1H), 1.563-1.325 (m,  
 802 6H), 1.169 (s, 12H), 1.039 (d,  $J=6.8\text{Hz}$ , 3H), 0.951 (d,  $J=6.8\text{Hz}$ , 3H).

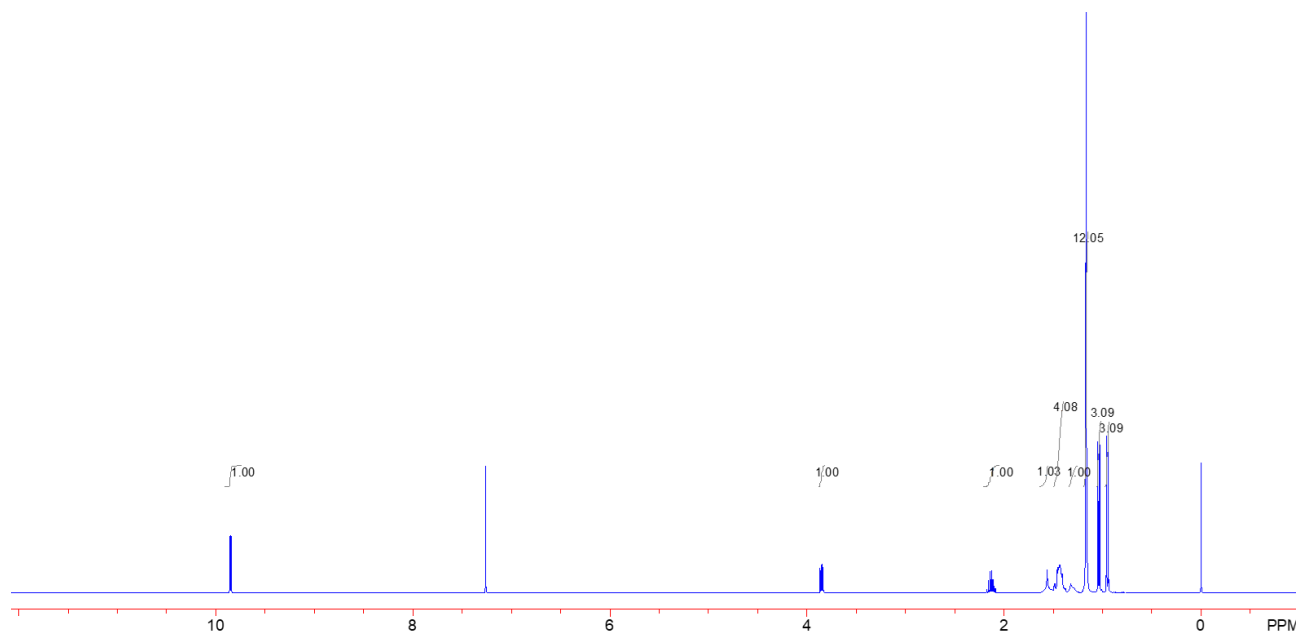

803  
 804 Figure S27. The HRMS of structure 11.

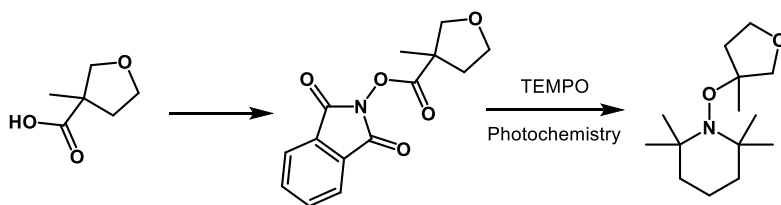

807 Scheme S5. 2,2,6,6-tetramethyl-1-((3-methyltetrahydrofuran-3-yl)oxy)piperidine (Structure 10)

2,2,6,6-tetramethyl-1-((3-methyltetrahydrofuran-3-yl)oxy)piperidine (Structure 10) was obtained from Scheme 5. First, 3-methyltetrahydrofuran-3-carboxylic acid was reacted with 2-hydroxyisoindoline-1,3-dione. Then, 1,3-dioxoisoindolin-2-yl 3-methyltetrahydrofuran-3-carboxylate was obtained, which was then mixed with TEMPO. Finally, after a photochemical reaction occurred, Structure 10 was finally obtained.

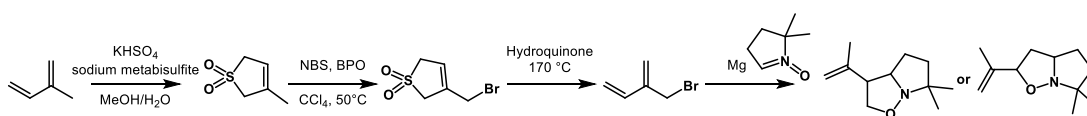

Scheme S6. 6,6-dimethyl-3-(prop-1-en-2-yl)hexahydropyrrolo[1,2-b]isoxazole or 6,6-dimethyl-2-(prop-1-en-2-yl)hexahydropyrrolo[1,2-b]isoxazole

To a solution of 1 (5 g, 0.073 mol) in methanol (146 mL) and water (40 mL) was added KHSO<sub>4</sub> (20 g, 0.146 mol) and sodium metabisulfite (70 g, 0.365 mol). The reaction mixture was stirred at 100 °C for 14 h under N<sub>2</sub>. The reaction mixture was cooled to room temperature and concentrated. The solution was extracted with EA (100 mL, 3 times). The combined organic layers were dried over anhydrous Na<sub>2</sub>SO<sub>4</sub> and concentrated under reduced pressure to afford the product (2.5 g, yield 25.7%). To a solution of 2 (22 g, 166 mmol) in chloroform (250 mL) was added NBS (35.4 g, 199 mmol) and BPO (2 g, 8.3 mmol). The reaction mixture was stirred at 75 °C for 16 h under N<sub>2</sub>. The reaction mixture was poured into water (500 mL) and extracted with DCM (100 mL, 3 times). The combined organic layers were washed with water (100 mL) and brine (100 mL), dried over Na<sub>2</sub>SO<sub>4</sub> and concentrated to give crude product. The crude product was purified by silica gel chromatography (PE/EA=20/1~5/1) to give product (11 g, yield 31.2%). A 50 mL round-bottom flask was charged with (5 g, 23.6 mmol) of 3-bromomethyl-2,5-dihydrothiophene-1,1-dioxide and



829 about 20 mg of hydroquinone, and connected to a condenser with a receiving flask. The round-  
 830 bottom flask was then placed in a pre-heated oil bath at 170 °C. After the solid had melted, vacuum  
 831 was applied with a water aspirator. Sulfur dioxide was evolved and the product was collected in  
 832 the receiving flask cooled in an ice bath to give product (2 g, yield 57%). To a solution of Mg (0.2  
 833 g, 8.3 mmol) in THF (5 mL) was added 4 (0.6 g, 4.08 mmol) in THF (2 mL) dropwise at 30 °C.  
 834 The reaction mixture was stirred at 30 °C for 1 h under N<sub>2</sub>. Then DMPO (565 mg, 5.0 mmol) was  
 835 added dropwise at 30 °C. Then the mixture was stirred at 50 °C for 5 h. The solution was poured  
 836 into water (20 mL) and extracted with DCM (30 mL, 3 times). The combined organic layers were  
 837 dried over Na<sub>2</sub>SO<sub>4</sub> and concentrated to give crude product. The crude product was purified by  
 838 prep-HPLC.

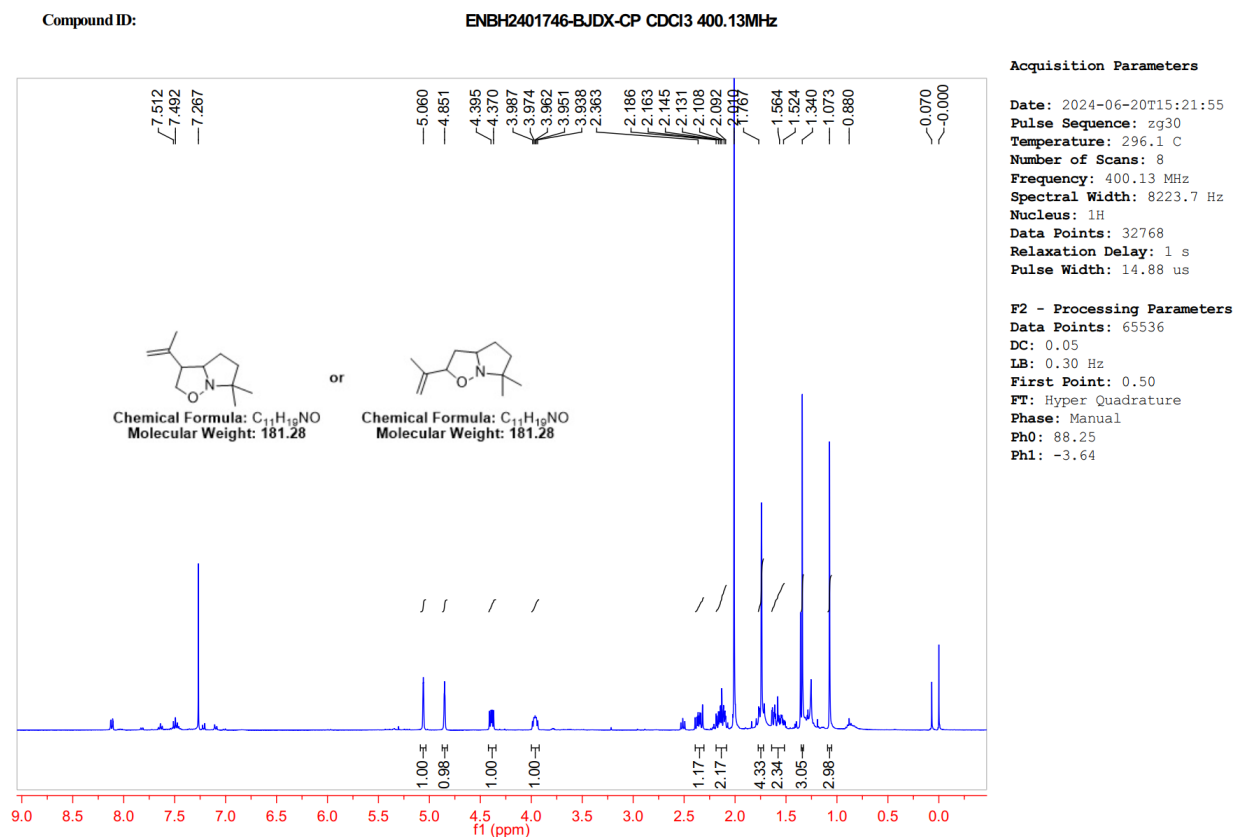

839

840 Figure S28. The HRMS of 6,6-dimethyl-3-(prop-1-en-2-yl)hexahydropyrrolo[1,2-b]isoxazole.

- 842 70 Williams, P. J. H. *et al.* New Approach to the Detection of Short-Lived Radical Intermediates.  
843 *Journal of the American Chemical Society* **144**, 15969-15976 (2022).  
844 <https://doi.org/10.1021/jacs.2c03618>
- 845 71 Kanaya, Y., Sadanaga, Y., Hirokawa, J., Kajii, Y. & Akimoto, H. Development of a ground-based  
846 LIF instrument for measuring HOx radicals: Instrumentation and calibrations. *J Atmos Chem* **38**,  
847 73-110 (2001). <https://doi.org/10.1023/A:1026559321911>
- 848 72 Wang, F. *et al.* Development of a field system for measurement of tropospheric OH radical using  
849 laser-induced fluorescence technique. *Optics Express* **27**, A419-A435 (2019).
- 850 73 Heard, D. E. & Pilling, M. J. Measurement of OH and HO<sub>2</sub> in the troposphere. *Chemical Reviews*  
851 **103**, 5163-5198 (2003). <https://doi.org/10.1021/cr020522s>
- 852 74 Cantrell, C. A., Zimmer, A. & Tyndall, G. S. Absorption cross sections for water vapor from 183  
853 to 193 nm. *Geophysical Research Letters* **24**, 2195-2198 (1997).
- 854 75 Creasey, D. J., Heard, D. E. & Lee, J. D. Absorption cross-section measurements of water vapour  
855 and oxygen at 185 nm. Implications for the calibration of field instruments to measure OH, HO<sub>2</sub>  
856 and RO<sub>2</sub> radicals. *Geophysical Research Letters* **27**, 1651-1654 (2000).
- 857 76 Palm, B. B. *et al.* In situ secondary organic aerosol formation from ambient pine forest air using  
858 an oxidation flow reactor. *Atmospheric Chemistry and Physics* **16**, 2943-2970 (2016).
- 859 77 Tang, M., Cox, R. & Kalberer, M. Compilation and evaluation of gas phase diffusion coefficients  
860 of reactive trace gases in the atmosphere: volume 1. Inorganic compounds. *Atmospheric*  
861 *Chemistry and Physics* **14**, 9233-9247 (2014).
- 862 78 Hansel, A., Scholz, W., Mentler, B., Fischer, L. & Berndt, T. Detection of RO<sub>2</sub> radicals and other  
863 products from cyclohexene ozonolysis with NH<sub>4</sub><sup>+</sup> and acetate chemical ionization mass  
864 spectrometry. *Atmospheric Environment* **186**, 248-255 (2018).
- 865 79 Huang, Y. *et al.* Unified theory of vapor-wall mass transport in Teflon-walled environmental  
866 chambers. *Environmental science & technology* **52**, 2134-2142 (2018).
- 867 80 Peng, Z. & Jimenez, J. L. Radical chemistry in oxidation flow reactors for atmospheric chemistry  
868 research. *Chemical Society Reviews* **49**, 2570-2616 (2020).
- 869 81 Davis, D. D., Ravishankara, A. R. & Fischer, S. SO<sub>2</sub> oxidation via the hydroxyl radical:  
870 Atmospheric fate of HSOx radicals. *Geophysical Research Letters* **6**, 113-116 (1979).  
871 <https://doi.org/10.1029/GL006i002p00113>
- 872 82 Mao, J. *et al.* Airborne measurement of OH reactivity during INTEX-B. *Atmospheric Chemistry*  
873 *and Physics* **9**, 163-173 (2009). <https://doi.org/10.5194/acp-9-163-2009>
- 874 83 Jenkin, M., Young, J. & Rickard, A. The MCM v3. 3.1 degradation scheme for isoprene.  
875 *Atmospheric Chemistry and Physics* **15**, 11433-11459 (2015).
- 876 84 Ma, F. *et al.* Atmospheric Chemistry of Allylic Radicals from Isoprene: A Successive Cyclization-  
877 Driven Autoxidation Mechanism. *Environmental Science & Technology* **55**, 4399-4409 (2021).  
878 <https://doi.org/10.1021/acs.est.0c07925>
- 879 85 Atkinson, R. Rate constants for the atmospheric reactions of alkoxy radicals: An updated  
880 estimation method. *Atmospheric Environment* **41**, 8468-8485 (2007).
- 881 86 Frisch, M. e. *et al.* (Gaussian, Inc. Wallingford, CT, 2016).
- 882 87 Glowacki, D. R., Liang, C.-H., Morley, C., Pilling, M. J. & Robertson, S. H. MESMER: an open-  
883 source master equation solver for multi-energy well reactions. *The Journal of Physical Chemistry*  
884 *A* **116**, 9545-9560 (2012).
- 885 88 Georgievskii, Y. & Klippenstein, S. J. Variable reaction coordinate transition state theory:  
886 Analytic results and application to the C<sub>2</sub>H<sub>3</sub> + H → C<sub>2</sub>H<sub>4</sub> reaction. *The Journal of chemical*  
887 *physics* **118**, 5442-5455 (2003).

- 89 Horváth, G., Horváth, I., Almousa, S. A.-D. & Telek, M. Numerical inverse Laplace transformation using concentrated matrix exponential distributions. *Performance Evaluation* **137**, 102067 (2020).
- 90 Carr, S. A. *et al.* Experimental and Modeling Studies of the Pressure and Temperature Dependences of the Kinetics and the OH Yields in the Acetyl+O<sub>2</sub> Reaction. *The Journal of Physical Chemistry A* **115**, 1069-1085 (2011).
- 91 Maranzana, A., Barker, J. R. & Tonachini, G. Master equation simulations of competing unimolecular and bimolecular reactions: application to OH production in the reaction of acetyl radical with O<sub>2</sub>. *Physical Chemistry Chemical Physics* **9**, 4129-4141 (2007).
- 92 Tilmes, S. *et al.* Climate forcing and trends of organic aerosols in the Community Earth System Model (CESM2). *Journal of Advances in Modeling Earth Systems* **11**, 4323-4351 (2019).
- 93 Emmons, L. K. *et al.* The Chemistry Mechanism in the Community Earth System Model Version 2 (CESM2). *Journal of Advances in Modeling Earth Systems* **12**, e2019MS001882 (2020). <https://doi.org/https://doi.org/10.1029/2019MS001882>
- 94 Van Marle, M. J. *et al.* Historic global biomass burning emissions for CMIP6 (BB4CMIP) based on merging satellite observations with proxies and fire models (1750–2015). *Geoscientific Model Development* **10**, 3329-3357 (2017).
- 95 Hoesly, R. M. *et al.* Historical (1750–2014) anthropogenic emissions of reactive gases and aerosols from the Community Emissions Data System (CEDS). *Geoscientific Model Development* **11**, 369-408 (2018).
- 96 Feng, L. *et al.* The generation of gridded emissions data for CMIP6. *Geoscientific Model Development* **13**, 461-482 (2020).
- 97 Guenther, A. *et al.* The Model of Emissions of Gases and Aerosols from Nature version 2.1 (MEGAN2. 1): an extended and updated framework for modeling biogenic emissions. *Geoscientific Model Development* **5**, 1471-1492 (2012).
- 98 Schwantes, R. H. *et al.* Comprehensive isoprene and terpene gas-phase chemistry improves simulated surface ozone in the southeastern US. *Atmos. Chem. Phys.* **20**, 3739-3776 (2020). <https://doi.org/10.5194/acp-20-3739-2020>
- 99 Gerritz, L., Perraud, V., Weber, K. M., Shiraiwa, M. & Nizkorodov, S. A. Application of UHPLC-ESI-MS/MS to Identify Free Radicals via Spin Trapping with BMPO. *The Journal of Physical Chemistry A* **128**, 10240-10249 (2024). <https://doi.org/10.1021/acs.jpca.4c05311>
- 100 Bauer, N. A., Hoque, E., Wolf, M., Kleigrew, K. & Hofmann, T. Detection of the formyl radical by EPR spin-trapping and mass spectrometry. *Free Radical Biology and Medicine* **116**, 129-133 (2018).
- 101 Liggio, J., Li, S.-M. & McLaren, R. Reactive uptake of glyoxal by particulate matter. *Journal of Geophysical Research: Atmospheres* **110** (2005). <https://doi.org/https://doi.org/10.1029/2004JD005113>
- 102 Knote, C. *et al.* Simulation of semi-explicit mechanisms of SOA formation from glyoxal in aerosol in a 3-D model. *Atmospheric Chemistry and Physics* **14**, 6213-6239 (2014).
- 103 Fu, T.-M. *et al.* Global budgets of atmospheric glyoxal and methylglyoxal, and implications for formation of secondary organic aerosols. *Journal of Geophysical Research: Atmospheres* **113** (2008). <https://doi.org/https://doi.org/10.1029/2007JD009505>
